# Supplementary material for: Mechanistic study of the hydrolytic degradation and protonation of temozolomide
Source: Royal Society of Chemistry journal article supplement (doi:10.1039/c5ra04680g), 2015-01-01
Supplement: c5ra04680g1.pdf [file c5ra04680g1.pdf]

# Supplementary Information

## Mechanistic Study of Hydrolytic Degradation and Protonation of Temozolomide

*Saber Mirzaei<sup>a</sup>, M. H. Khalilian<sup>a</sup>, and Avat (Arman) Taherpour<sup>a,b\*</sup>*

*<sup>a</sup>Faculty of Chemistry, Razi University, P.O.Box: 67149-67346, Kermanshah, Iran.*

*<sup>b</sup>Medical Biology Research Center, Kermanshah University of Medical Sciences, Kermanshah, Iran.*

*E-mail: avatarman.taherpour@gmail.com*

## Table of Contents

|                                                                                                                                                         | Page No. |
|---------------------------------------------------------------------------------------------------------------------------------------------------------|----------|
| <b>Figure S1.</b> The path-1 relative energy profile of TMZ decomposition for rotamer B.....                                                            | S3       |
| <b>Figure S2.</b> The path-2 relative energy profile of TMZ decomposition for rotamer B.....                                                            | S4       |
| <b>Table S1.</b> Calculated relative free energies for both TMZ-B degradation paths.....                                                                | S5       |
| <b>Figure S3.</b> The overall mechanism of TMZ decomposition.....                                                                                       | S5       |
| <b>Figure S4.</b> The base-catalysed degradation of TMZ.....                                                                                            | S6       |
| <b>Figure S5.</b> Atom numbering assignment of TMZ.....                                                                                                 | S7       |
| <b>Table S2.</b> Protonation free energies for all protonated atoms.....                                                                                | S7       |
| <b>Table S3.</b> NPA partial atomic charges for TMZ.....                                                                                                | S8       |
| <b>Table S4.</b> Absolute free energies (a.u.) for both TMZ degradation paths of rotamer A.....                                                         | S8       |
| <b>Table S5.</b> Absolute free energies (a.u.) for the gas and water-mediated interconversion between N9 and O13 protonated forms of Temozolomide.....  | S9       |
| <b>Table S6.</b> Absolute free energies (a.u.) for all protonated atoms.....                                                                            | S9       |
| <b>S1.</b> pK <sub>a</sub> calculations procedure and methods.....                                                                                      | S10      |
| <b>S2.</b> Figure and Cartesian coordinates of all optimized protonated species at the B3LYP/6-311++G(2d,p) level of theory.....                        | S11      |
| <b>S3.</b> Cartesian coordinates of all optimized structures of Temozolomide degradation at the B3LYP/6-31+G(d) level of theory.....                    | S20      |
| <b>S4.</b> Cartesian coordinates of optimized transition states of Temozolomide reaction with different nucleophiles at the CBS-4M level of theory..... | S32      |

**Figure S1.** The path-1 relative energy profile of TMZ decomposition for rotamer B (also see table s1).

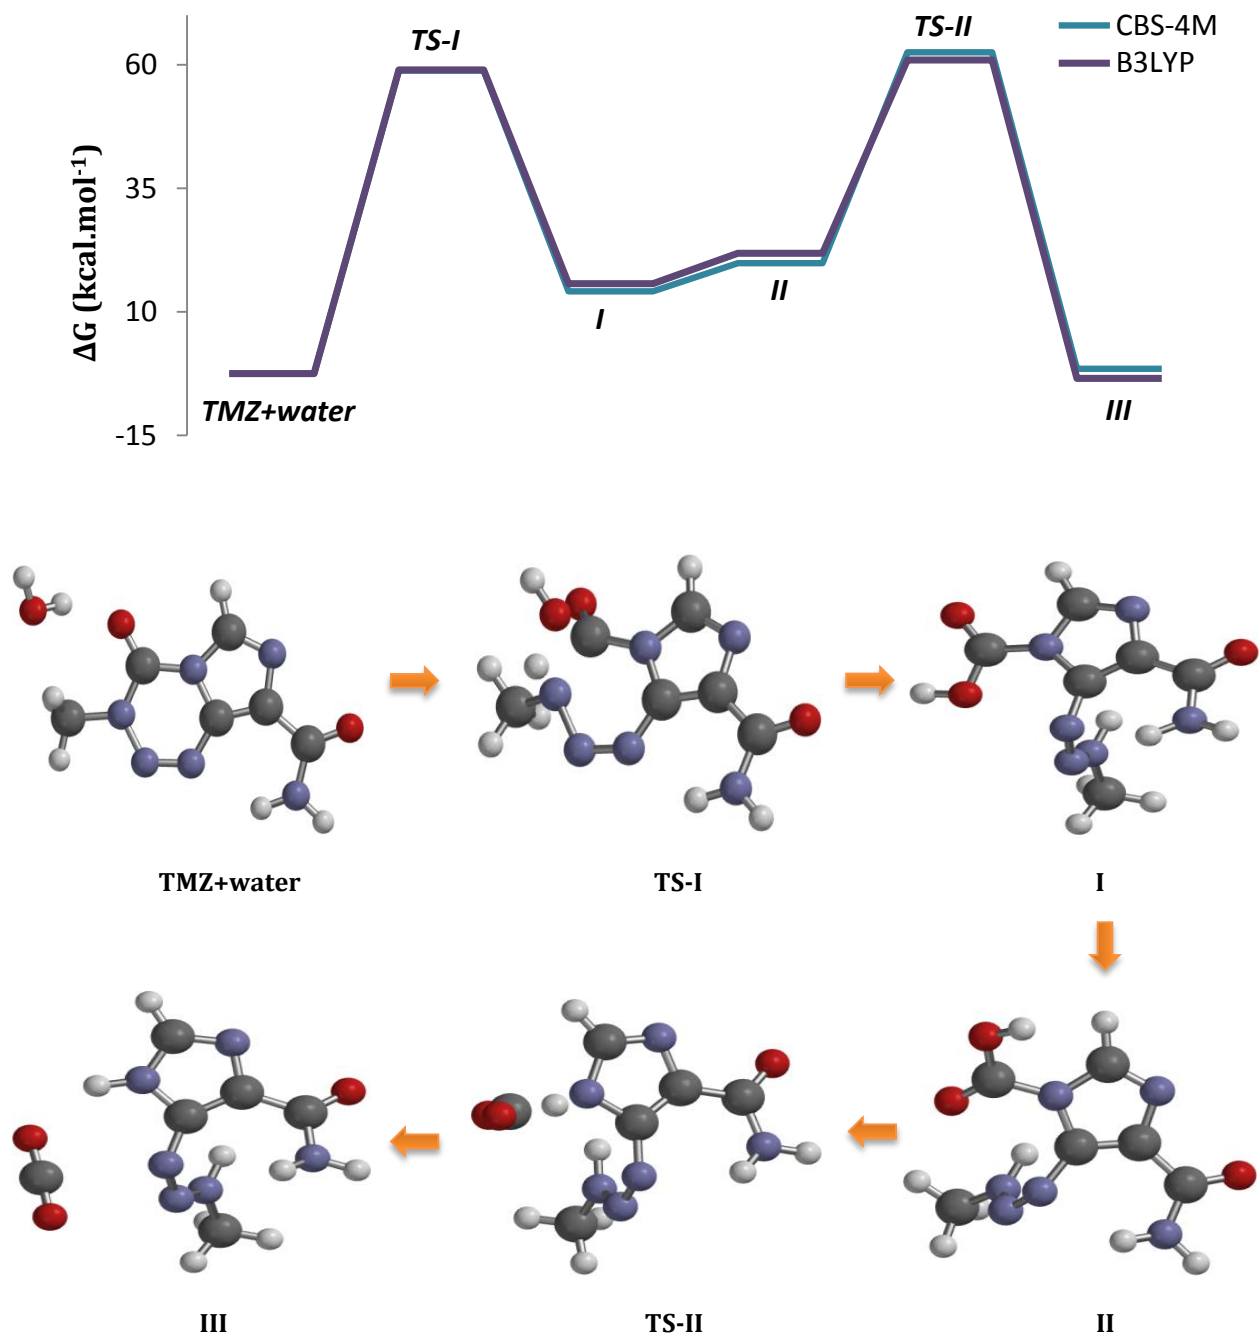

**Figure S2.** The path-2 relative energy profile of TMZ decomposition for rotamer B (also see table s1).

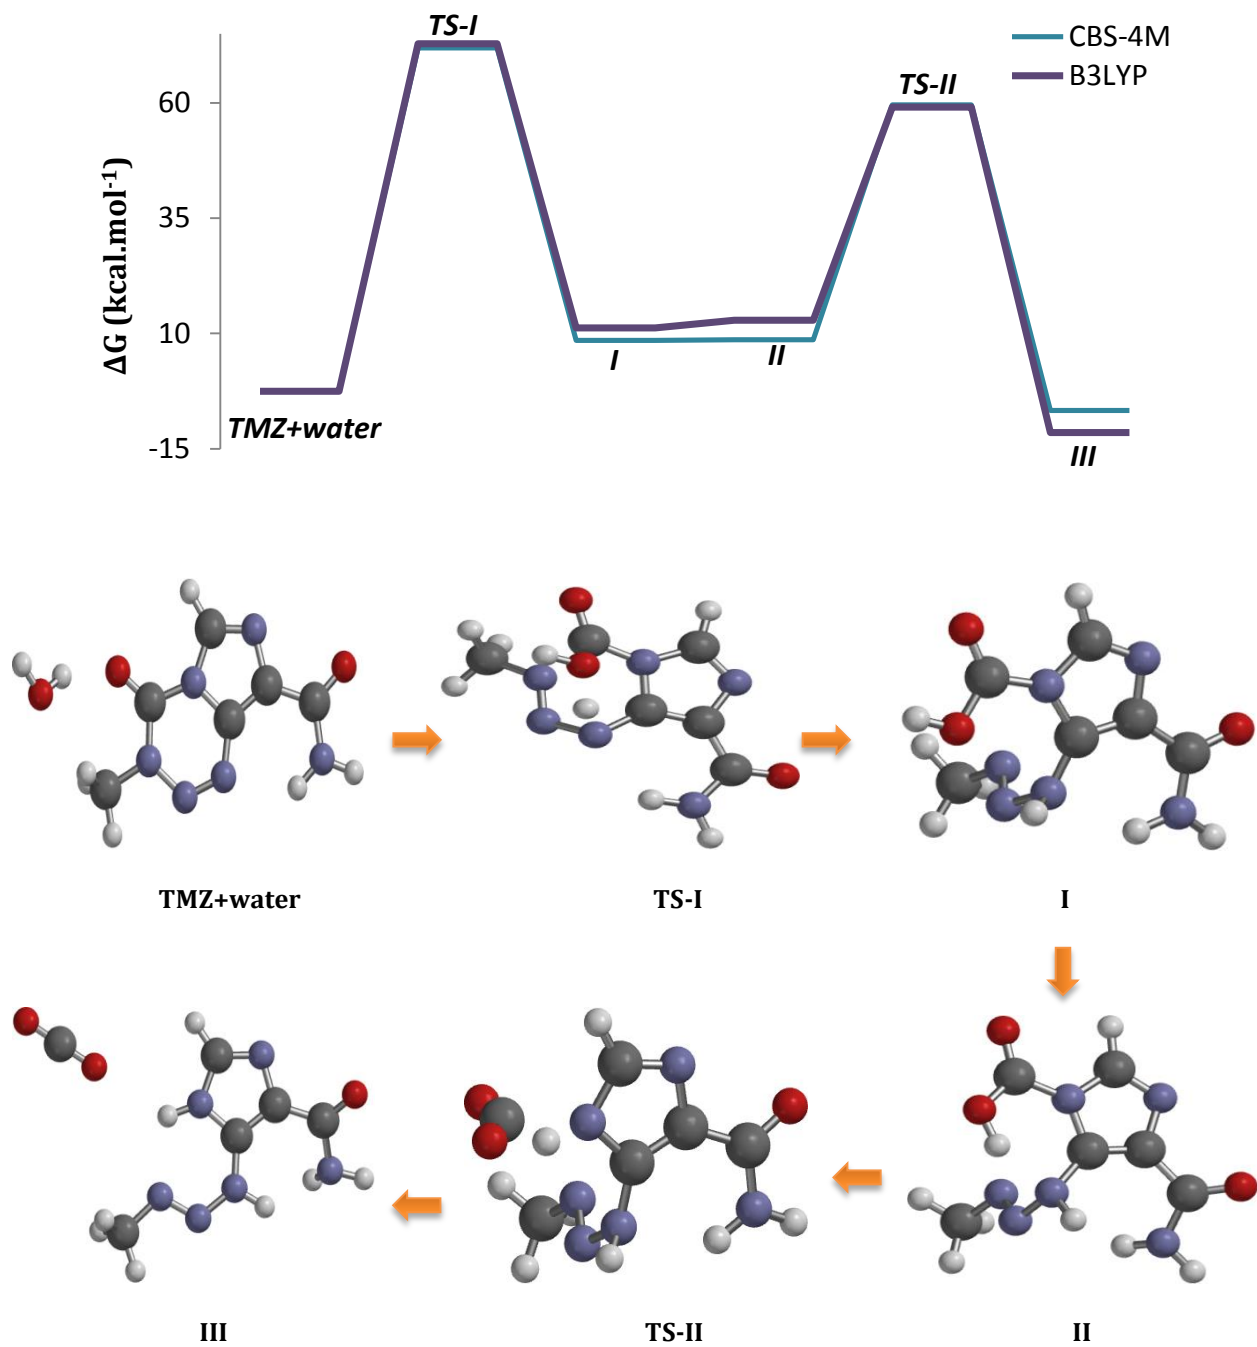

**Table S1.** Calculated relative free energies ( $\Delta G$ ) for both TMZ-B degradation paths (in kcal.mol<sup>-1</sup>)

| Structure <sup>a</sup> | PATH-1 |                 | PATH-2 |                 |
|------------------------|--------|-----------------|--------|-----------------|
|                        | CBS-4M | B3LYP/6-31+G(d) | CBS-4M | B3LYP/6-31+G(d) |
| SR <sup>b</sup>        | -7.71  | -3.61           | -7.71  | -3.61           |
| TS-I                   | 58.82  | 58.94           | 71.96  | 72.85           |
| I                      | 14.15  | 15.68           | 8.53   | 11.23           |
| II                     | 19.83  | 21.87           | 8.66   | 12.87           |
| TS-II                  | 62.51  | 60.97           | 59.59  | 59.12           |
| III                    | -1.49  | -3.43           | -6.67  | -11.47          |

<sup>a</sup> The TMZ+water structure has been optimized as a reactant and all other energies were compared to this structure relatively.

<sup>b</sup> Separated reactants.

**Figure S3.** The overall mechanism of TMZ decomposition.

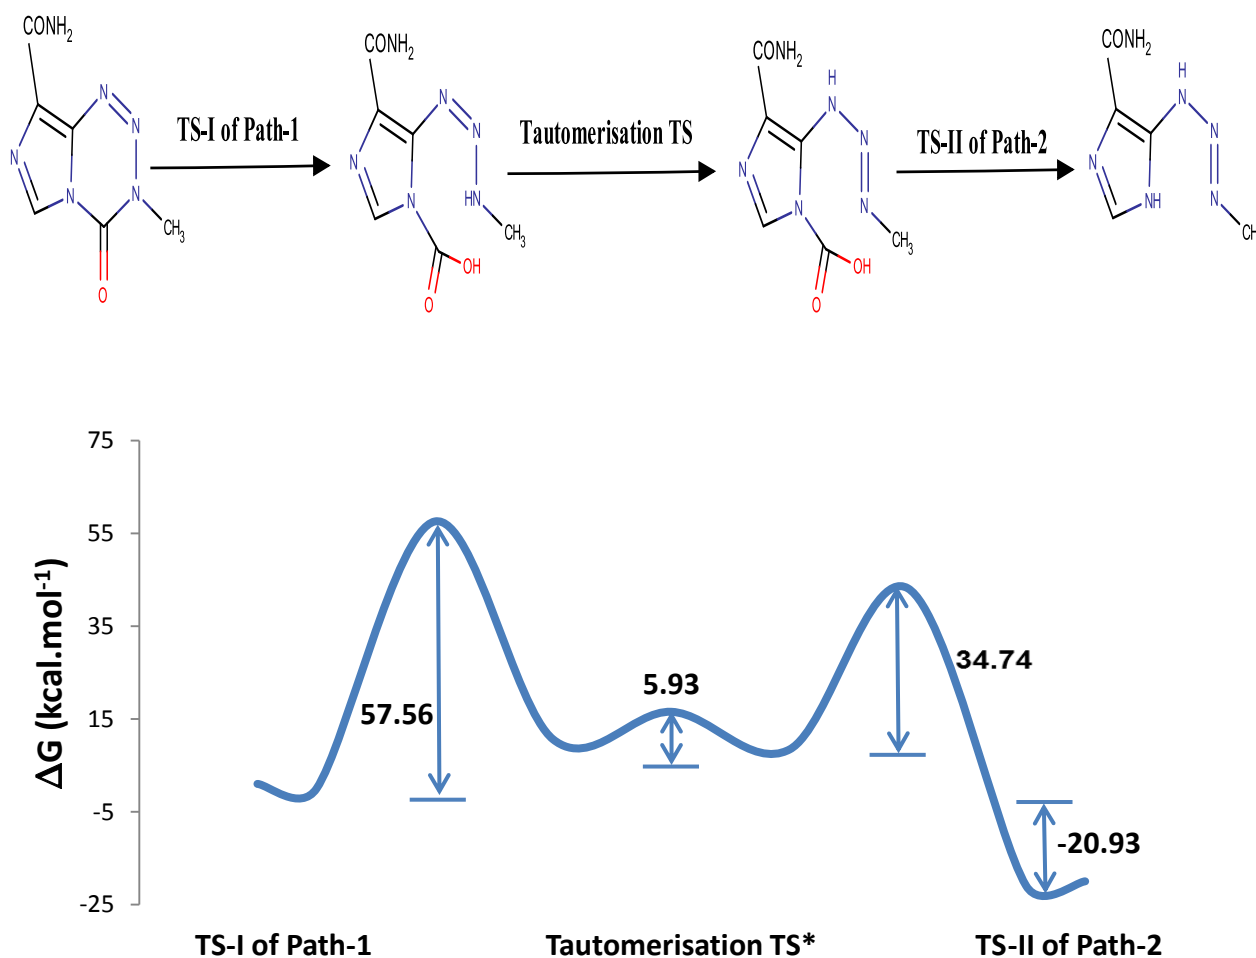

\*The energy of tautomerization TS is adopted from ref.36 (Doucet, K. G.; Glister, J. F.; Pye, C. C., Can. J. Chem. 2010).

**Figure S4.** The base-catalysed degradation of TMZ.

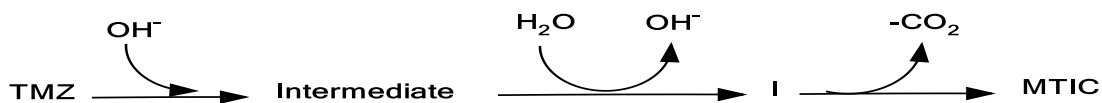

|                                       | TS-I           | Intermediate | I     | II    | TS-II | III   |
|---------------------------------------|----------------|--------------|-------|-------|-------|-------|
| $\Delta G$ (kcal.mol <sup>-1</sup> )* | 7.23 (20.58)** | -29.49       | 30.23 | 36.57 | 75.41 | 14.29 |

\*Calculated at CBS-4M. \*\*For second detected transition state.

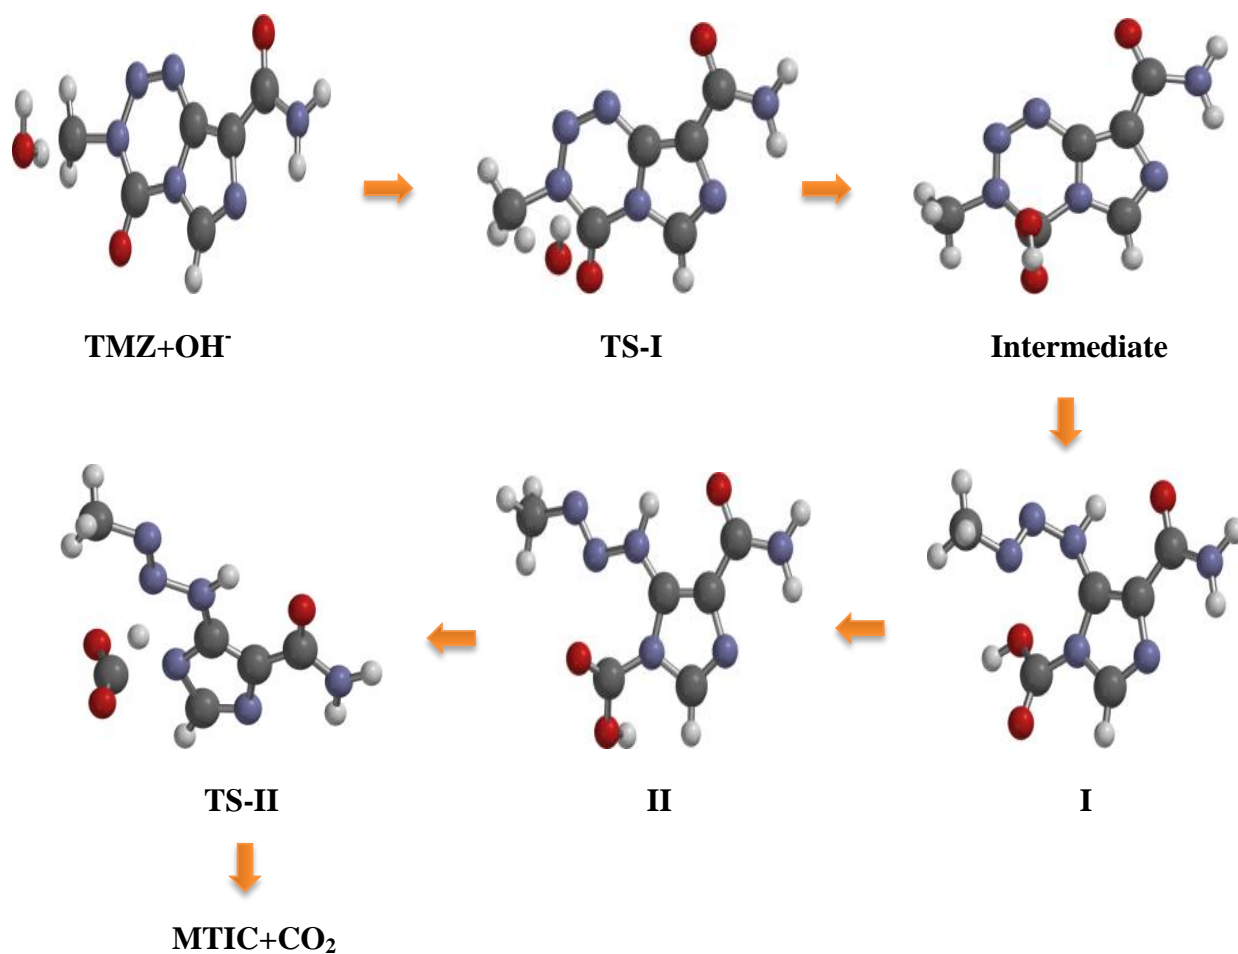

**Figure S5.** Atom numbering assignment of TMZ.

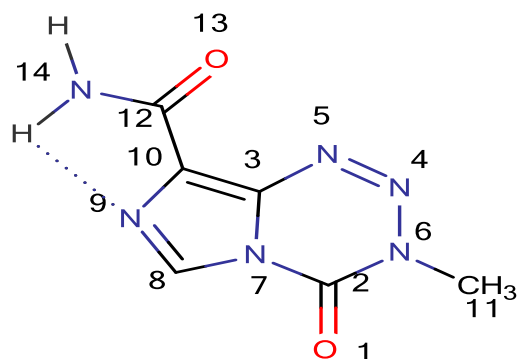

**Table S2.** Protonation free energies for all protonated atoms.

| Position    | B3LYP/6-311++g(2d,p) |         | CBS-4M  |         |
|-------------|----------------------|---------|---------|---------|
|             | TMZA                 | TMZB    | TMZA    | TMZB    |
| <b>O13</b>  | -217.83              | -219.44 | -215.99 | -217.72 |
| <b>N-9</b>  | -205.72              | -217.21 | -205.13 | -216.61 |
| <b>N-5</b>  | -210.61              | -196.14 | -209.32 | -195.21 |
| <b>N-6</b>  | -210.62              | -----   | -206.35 | -----   |
| <b>N-14</b> | -201.59              | -200.61 | -200.66 | -200.59 |
| <b>N-4</b>  | -197.06              | -----   | -191.99 | -185.31 |
| <b>O-1</b>  | -186.45              | -184.01 | -183.59 | -180.68 |
| <b>N-7</b>  | -153.20              | -152.80 | -150.97 | -149.79 |

**Table S3.** NPA partial atomic charges for TMZ.

| Atom | TMZ-A  | TMZ-B  | O13-A  | O13-B  | N9-B   |
|------|--------|--------|--------|--------|--------|
| O1   | -0.591 | -0.582 | -0.513 | -0.516 | -0.512 |
| C2   | 0.830  | 0.832  | 0.833  | 0.832  | 0.833  |
| C3   | 0.289  | 0.270  | 0.351  | 0.356  | 0.309  |
| N4   | 0.009  | 0.011  | 0.084  | 0.077  | 0.077  |
| N5   | -0.174 | -0.237 | -0.292 | -0.268 | -0.223 |
| N6   | -0.309 | -0.308 | -0.258 | -0.259 | -0.276 |
| N7   | -0.448 | -0.452 | -0.440 | -0.438 | -0.414 |
| C8   | 0.255  | 0.255  | 0.286  | 0.288  | 0.320  |
| N9   | -0.476 | -0.413 | -0.427 | -0.452 | -0.439 |
| C10  | 0.059  | 0.065  | -0.019 | -0.021 | 0.107  |
| C11  | -0.352 | -0.351 | -0.354 | -0.355 | -0.354 |
| C12  | 0.640  | 0.641  | 0.682  | 0.684  | 0.635  |
| O13  | -0.608 | -0.595 | -0.611 | -0.596 | -0.595 |
| N14  | -0.795 | -0.806 | -0.672 | -0.681 | -0.755 |

**Table S4.** Absolute free energies (a.u.) for both TMZ degradation paths of rotamer A.

| Structure | PATH-1       |                     |                     |                     | PATH-2       |                     |                     |                     |
|-----------|--------------|---------------------|---------------------|---------------------|--------------|---------------------|---------------------|---------------------|
|           | CBS-4M (gas) | B3LYP/6-31+g* (gas) | B3LYP/6-31+g* (PCM) | B3LYP/6-31+g* (SM8) | CBS-4M (gas) | B3LYP/6-31+g* (gas) | B3LYP/6-31+g* (PCM) | B3LYP/6-31+g* (SM8) |
| TMZ+water | -786.646167  | -787.518630         | -787.548922         | -787.549956         | -786.646167  | -787.518630         | -787.548922         | -787.549956         |
| TS-I      | -786.545939  | -787.426907         | -787.457139         | -787.455377         | -786.523393  | -787.403733         | -787.438539         | -787.438138         |
| I         | -786.618428  | -787.501717         | -787.532145         | -787.528112         | -786.634829  | -787.512654         | -787.537259         | -787.536004         |
| II        | -786.603787  | -787.481047         | -787.516100         | -787.516491         | -786.624735  | -787.505216         | -787.532861         | -787.534928         |
| TS-II     | -786.536257  | -787.419554         | -787.448036         | -787.447824         | -786.562884  | -787.449846         | -787.471182         | -787.473231         |
| III       | -786.636772  | -787.521400         | -787.553524         | -787.543671         | -786.660227  | -787.551999         | -787.577221         | -787.566180         |



**Table S5.** Absolute free energies (a.u.) for the gas and water-mediated interconversion between N9 and O13 protonated forms of Temozolomide.

| Structure   | G3MP2       | CBS-4M      | B3LYP/6-311++G(2d,p) |
|-------------|-------------|-------------|----------------------|
| <b>O13</b>  | -710.601333 | -710.627420 | -711.644300          |
| <b>TS-1</b> | -710.580392 | -710.607327 | -711.624740          |
| <b>N9</b>   | -710.597618 | -710.625645 | -711.640749          |
| <b>O13w</b> | -786.972511 | -787.001170 | -788.108999          |
| <b>TSw</b>  | -786.962851 | -786.994410 | -788.102395          |
| <b>N9w</b>  | -786.970553 | -787.002554 | -788.107598          |

**Table S6.** Absolute free energies (a.u.) for all protonated atoms.

| Position    | B3LYP/6-311++g(2d,p) |             | CBS-4M      |             |
|-------------|----------------------|-------------|-------------|-------------|
|             | TMZA                 | TMZB        | TMZA        | TMZB        |
| <b>O13</b>  | -711.644159          | -711.644300 | -710.627151 | -710.627420 |
| <b>N-9</b>  | -711.624863          | -711.640749 | -710.609854 | -710.625645 |
| <b>N-5</b>  | -711.632656          | -711.607161 | -710.616524 | -710.591552 |
| <b>N-6</b>  | -711.632668          | -----       | -710.611783 | -----       |
| <b>N-14</b> | -711.618276          | -711.614288 | -710.602727 | -710.600124 |
| <b>N-4</b>  | -711.611060          | -----       | -710.588907 | -710.575774 |
| <b>O-1</b>  | -711.594145          | -711.587837 | -710.575510 | -710.568389 |
| <b>N-7</b>  | -711.541160          | -711.538096 | -710.523529 | -710.519158 |

| position            | O13         | N9          | N5          | O1          |
|---------------------|-------------|-------------|-------------|-------------|
| <b>G3MP2 / TMZA</b> | -710.601291 | -710.581320 | -710.587670 | -710.552008 |
| <b>G3MP2 / TMZB</b> | -710.601333 | -710.597618 | -710.562370 | -710.545997 |

## S1. pK<sub>a</sub> calculations procedure and methods.

The reported pK<sub>a</sub> values were obtained using the direct thermodynamic cycle (as follows).<sup>1</sup>

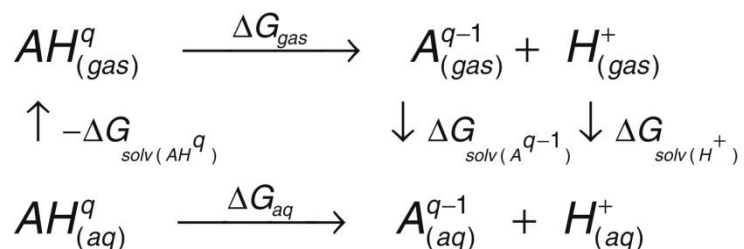

On the basis of this cycle the  $\Delta G$  obtained by this formula:

$$\begin{aligned} \Delta G_{aq} = & G_{gas}(H^+) + G_{gas}(A^{q-1}) - G_{gas}(AH^q) \\ & + \Delta G_{solv}(H^+) + \Delta G_{solv}(A^{q-1}) - \Delta G_{solv}(AH^q) + RT \ln 24.46 \end{aligned}$$

Eventually, from the  $\Delta G$ , the pK<sub>a</sub> could be achieved. Following methods were used for this calculation:

The B3LYP/6-31+G(d,p) level was used for both solvation and gas phase calculations. The -265.9 kcal.mol<sup>-1</sup> value was used for free energy of solvation of H<sup>+</sup> from Tissandier and coworkers.<sup>2</sup> It should be mentioned that the mono-hydrated TMZs were used for these computations to give better results.

As there is no experimental data available for pK<sub>a</sub> of TMZ, imidazole ring is selected to see the certainty of the used methods. The calculated imidazole pK<sub>a</sub> is 7.35, which is in notable agreement to the experimental, 6.97, value.

|           | Exp. pK <sub>a</sub> | Calc. pK <sub>a</sub> |
|-----------|----------------------|-----------------------|
| Imidazole | 6.97                 | 7.35                  |
| TMZ       | ---                  | -2.625*               |

\* Average value of O13 and N9 protonated species.

<sup>1</sup>R. Casasnovas, J. Ortega-Castro, J. Frau, J. Donoso, F. Muñoz. Int. J. Quantum Chem., 2014.

<sup>2</sup>M.D. Tissandier, K.A. Cowen, W.Y. Feng, E. Gundlach, M.H. Cohen, A.D. Earhart, J.V. Coe, J. Phys. Chem. A., 1998.

**S2.** Figure and Cartesian coordinates of all optimized protonated species at the B3LYP/6-311++G(2d,p) level of theory.

---

**O13A**

**V1=74.22\* cm<sup>-1</sup>**

|   |             |             |             |
|---|-------------|-------------|-------------|
| O | -2.76842800 | 1.60403200  | 0.00024800  |
| C | -1.96531100 | 0.72198900  | 0.00022400  |
| C | 0.27338500  | -0.17452100 | -0.00017000 |
| N | -1.41259700 | -1.68051400 | -0.00018900 |
| N | -0.15657000 | -1.45969800 | -0.00027000 |
| N | -2.27916700 | -0.65175500 | 0.00004200  |
| N | -0.56983400 | 0.90559000  | -0.00008800 |
| C | 0.22228700  | 2.04412700  | -0.00037500 |
| N | 1.48794300  | 1.72711700  | 0.00014900  |
| C | 1.55209000  | 0.35450400  | 0.00003100  |
| C | -3.70606900 | -1.01987900 | 0.00002400  |
| C | 2.76648400  | -0.40231900 | 0.00015100  |
| O | 2.74825300  | -1.70863700 | 0.00030300  |
| N | 3.93406700  | 0.18822300  | -0.00008300 |
| H | -0.19932200 | 3.03675600  | -0.00043100 |
| H | -4.18398800 | -0.61061200 | 0.88841000  |
| H | -3.75478200 | -2.10414900 | -0.00055500 |
| H | -4.18420900 | -0.60963400 | -0.88778700 |
| H | 4.78780600  | -0.35552300 | -0.00008500 |
| H | 3.97943400  | 1.19982700  | -0.00004300 |
| H | 1.83237200  | -2.06597100 | -0.00016500 |

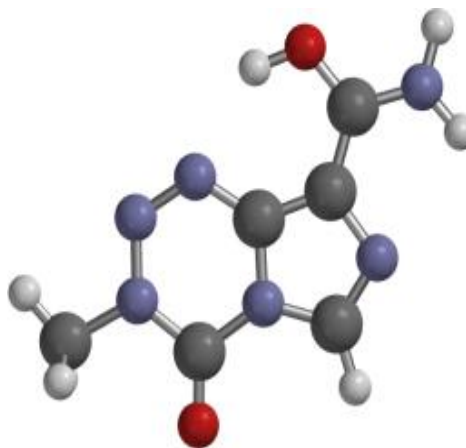


---

**O13B**

**V1=73.73 cm<sup>-1</sup>**

|   |             |             |             |
|---|-------------|-------------|-------------|
| O | 2.74830600  | 1.62624600  | 0.00075600  |
| C | 1.97067400  | 0.72067600  | 0.00074300  |
| C | -0.25600000 | -0.22874200 | -0.00051400 |
| N | 1.46884400  | -1.68916400 | -0.00051300 |
| N | 0.20745200  | -1.50322900 | -0.00069100 |
| N | 2.31585800  | -0.64099500 | 0.00013500  |
| N | 0.56998400  | 0.86925800  | 0.00018700  |
| C | -0.22918600 | 1.99835300  | -0.00023700 |
| N | -1.49019800 | 1.66362300  | -0.00054700 |
| C | -1.54103600 | 0.29051900  | -0.00019500 |
| C | 3.74943400  | -0.97903200 | 0.00010800  |
| C | -2.80560500 | -0.37928100 | 0.00001800  |
| O | -3.89948600 | 0.32951100  | 0.00030800  |
| N | -2.92231500 | -1.68427400 | 0.00012800  |
| H | 0.18114000  | 2.99557600  | -0.00012500 |
| H | 4.21939300  | -0.55937700 | -0.88777400 |
| H | 3.82070300  | -2.06206200 | -0.00013400 |
| H | 4.21930800  | -0.55976500 | 0.88821400  |
| H | -3.83918700 | -2.11365800 | 0.00038100  |
| H | -2.09412200 | -2.27043600 | 0.00025100  |
| H | -3.67486000 | 1.28218400  | 0.00024900  |

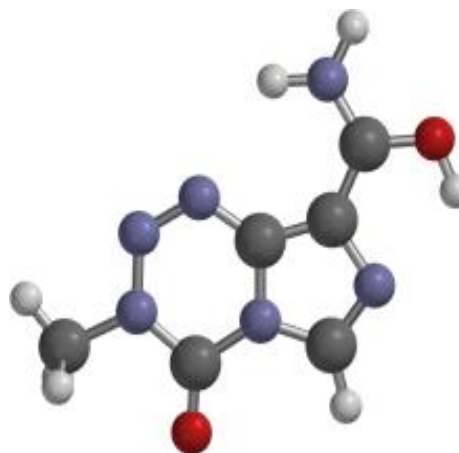


---

\*The lowest frequency from the optimized structure.

---

**N9 A****V1=39.34 cm<sup>-1</sup>**

|   |             |             |             |
|---|-------------|-------------|-------------|
| O | 2.73409500  | 1.62364300  | -0.11205800 |
| C | 1.99607200  | 0.68744500  | -0.03510200 |
| C | -0.27848600 | -0.26526400 | 0.03969700  |
| N | 1.45984600  | -1.70692000 | 0.17377800  |
| N | 0.21194400  | -1.53254500 | 0.15916700  |
| N | 2.33023500  | -0.64368500 | 0.06985900  |
| N | 0.57038700  | 0.83480300  | -0.04143800 |
| C | -0.14503400 | 1.95893000  | -0.13364000 |
| N | -1.42857200 | 1.59377900  | -0.09804100 |
| C | -1.56567500 | 0.22217100  | 0.00253800  |
| C | 3.75839200  | -1.00364500 | 0.08812200  |
| C | -2.87877300 | -0.51216200 | -0.08306200 |
| O | -2.96639400 | -1.46682700 | -0.81342000 |
| N | -3.89950400 | 0.05326200  | 0.62339600  |
| H | 0.25167600  | 2.95662500  | -0.22875600 |
| H | 4.22776600  | -0.67288900 | -0.83686300 |
| H | 3.80930200  | -2.08427900 | 0.17902000  |
| H | 4.24419900  | -0.52213600 | 0.93517400  |
| H | -4.78277700 | -0.44126700 | 0.58638600  |
| H | -3.71494700 | 0.55513400  | 1.48042300  |
| H | -2.20615000 | 2.23856600  | -0.18992000 |

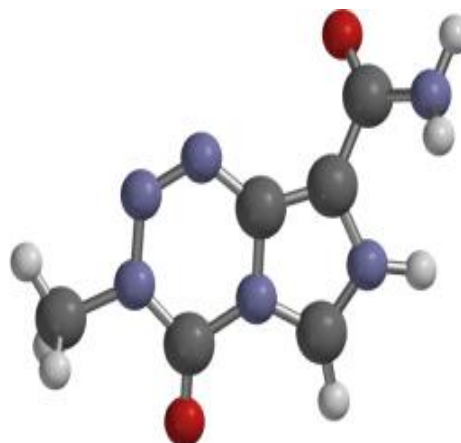

---

**N9 B****V1=70.15 cm<sup>-1</sup>**

|   |             |             |             |
|---|-------------|-------------|-------------|
| O | -2.73032700 | 1.63304900  | 0.00006000  |
| C | -1.98337700 | 0.70263100  | -0.00021900 |
| C | 0.27769400  | -0.26037000 | -0.00001500 |
| N | -1.46461500 | -1.70521700 | -0.00003900 |
| N | -0.21259800 | -1.53125600 | -0.00005800 |
| N | -2.32261900 | -0.64033400 | -0.00007800 |
| N | -0.56246300 | 0.84902700  | -0.00008600 |
| C | 0.17441500  | 1.97081500  | 0.00006700  |
| N | 1.44609000  | 1.58667100  | -0.00001800 |
| C | 1.56588900  | 0.21820900  | 0.00004200  |
| C | -3.75515100 | -0.98850400 | 0.00015300  |
| C | 2.95006400  | -0.35198100 | 0.00008000  |
| O | 3.86955300  | 0.44672800  | 0.00002600  |
| N | 3.04636700  | -1.69013100 | 0.00002100  |
| H | -0.20949000 | 2.97805200  | 0.00007200  |
| H | -4.22813200 | -0.57591100 | 0.88966500  |
| H | -3.81625200 | -2.07229200 | -0.00034300 |
| H | -4.22857300 | -0.57504800 | -0.88871700 |
| H | 3.96763100  | -2.10504000 | -0.00005900 |
| H | 2.23593400  | -2.29296100 | -0.00007700 |
| H | 2.27673400  | 2.17885600  | -0.00006400 |

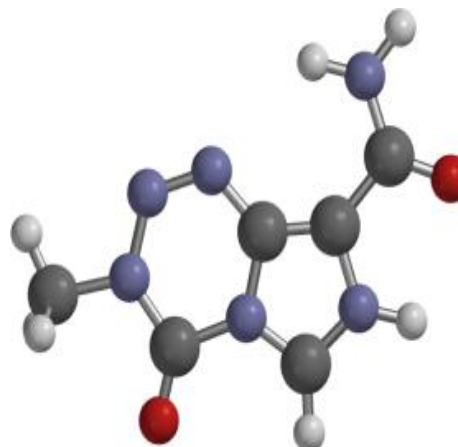

---

**N5-A****V1=70.96 cm<sup>-1</sup>**

|   |             |             |             |
|---|-------------|-------------|-------------|
| O | -2.74788500 | 1.60019900  | -0.00012700 |
| C | -1.92221600 | 0.74653200  | -0.00019100 |
| C | 0.33684700  | -0.13306300 | 0.00004700  |
| N | -1.42457300 | -1.66620100 | 0.00013700  |
| N | -0.17251000 | -1.39512300 | 0.00015500  |
| N | -2.26015900 | -0.65444700 | -0.00000700 |
| N | -0.53918100 | 0.93583000  | -0.00010400 |
| C | 0.25099400  | 2.06769200  | -0.00006800 |
| N | 1.52304600  | 1.74472100  | 0.00017600  |
| C | 1.60772700  | 0.38155700  | 0.00002800  |
| C | -3.69822100 | -0.99850900 | 0.00012000  |
| C | 2.79900800  | -0.50482800 | 0.00006000  |
| O | 2.58660800  | -1.71735500 | -0.00048500 |
| N | 3.99937900  | 0.08213900  | 0.00018800  |
| H | -0.16943000 | 3.06093500  | -0.00009600 |
| H | -4.16295900 | -0.57688300 | 0.88935000  |
| H | -3.76924200 | -2.08157800 | -0.00009700 |
| H | -4.16317200 | -0.57650100 | -0.88881300 |
| H | 4.82983700  | -0.49272800 | 0.00000900  |
| H | 4.09119800  | 1.08725900  | 0.00043700  |
| H | 0.50713700  | -2.16796900 | 0.00032100  |

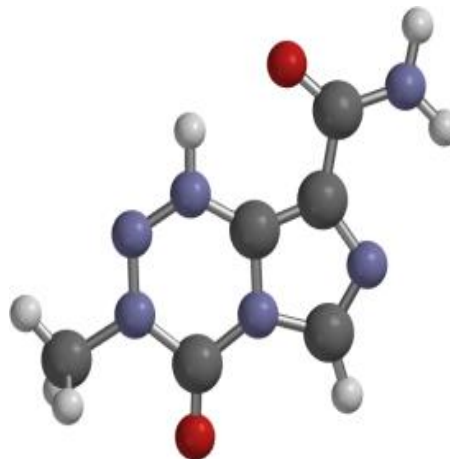

---

**N5-B****V1=56.98 cm<sup>-1</sup>**

|   |             |             |             |
|---|-------------|-------------|-------------|
| O | -2.78213000 | 1.53699900  | 0.05981200  |
| C | -1.93685500 | 0.70346700  | 0.03166000  |
| C | 0.35850400  | -0.12051300 | 0.05899000  |
| N | -1.38641500 | -1.68563800 | -0.12244100 |
| N | -0.13821200 | -1.38951200 | -0.05466000 |
| N | -2.24606100 | -0.70078300 | -0.07468700 |
| N | -0.56181200 | 0.91902700  | 0.08987500  |
| C | 0.18671000  | 2.07595700  | 0.14736300  |
| N | 1.46674800  | 1.80351400  | 0.13872400  |
| C | 1.61283300  | 0.44672300  | 0.08911200  |
| C | -3.67493900 | -1.07402300 | -0.15326100 |
| C | 2.92101500  | -0.26972800 | -0.07140200 |
| O | 3.78086500  | 0.15214100  | -0.79581800 |
| N | 2.94346000  | -1.51101600 | 0.55696300  |
| H | -0.27009600 | 3.05228900  | 0.19420500  |
| H | -4.18123700 | -0.72195700 | 0.74346100  |
| H | -3.72185800 | -2.15582200 | -0.22853500 |
| H | -4.11556500 | -0.60183400 | -1.02931500 |
| H | 3.82914800  | -1.99373500 | 0.43983800  |
| H | 2.61559800  | -1.53260200 | 1.51633600  |
| H | 0.50655800  | -2.17990700 | -0.09912600 |

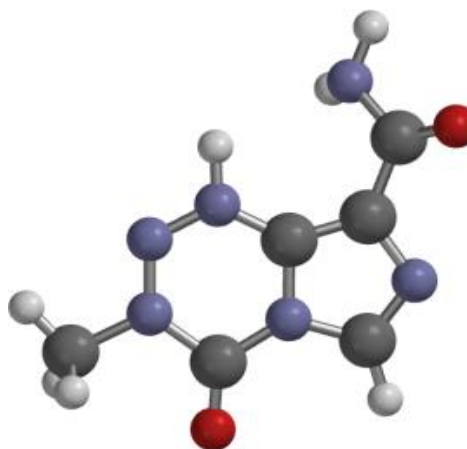

---

**N6-A****V1=46.13 cm<sup>-1</sup>**

|   |             |             |             |
|---|-------------|-------------|-------------|
| O | 2.70389100  | -1.41389500 | 0.81805100  |
| C | 2.15094500  | -0.59058400 | 0.15223400  |
| C | -0.34795400 | 0.24461000  | 0.01586000  |
| N | -0.00597200 | 2.63487700  | 0.42092700  |
| N | -0.16071900 | 1.55261000  | 0.23631700  |
| N | 2.65772900  | 0.48368600  | -0.47562100 |
| N | 0.66790900  | -0.70646600 | -0.00662800 |
| C | 0.02419800  | -1.89088900 | -0.10094200 |
| N | -1.29848900 | -1.76029000 | -0.15859400 |
| C | -1.56041400 | -0.45257200 | -0.07654700 |
| C | 4.10481000  | 0.74553400  | -0.41926800 |
| C | -2.89404800 | 0.22567600  | -0.06031400 |
| O | -2.89743400 | 1.44307300  | 0.03478600  |
| N | -3.95767100 | -0.58166600 | -0.15103000 |
| H | 0.56837000  | -2.82366900 | -0.12553600 |
| H | 4.45114100  | 0.58043200  | 0.59783700  |
| H | 4.27595600  | 1.78284600  | -0.69774700 |
| H | 4.65019200  | 0.08523300  | -1.09444900 |
| H | -4.88349400 | -0.17772200 | -0.13921300 |
| H | -3.85376300 | -1.58358600 | -0.21673200 |
| H | 2.15521200  | 0.85312800  | -1.27059400 |

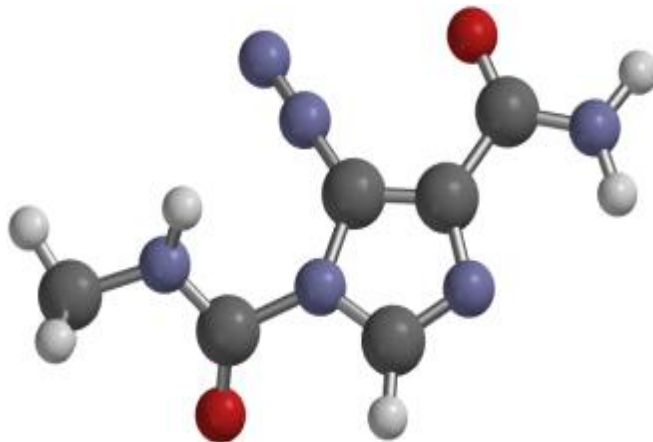

---

**N14-A****V1=67.49 cm<sup>-1</sup>**

|   |             |             |             |
|---|-------------|-------------|-------------|
| O | 2.68766600  | 1.71095700  | 0.00003200  |
| C | 1.97701300  | 0.74975900  | -0.00027600 |
| C | -0.20161400 | -0.33178500 | -0.00004000 |
| N | 1.61079400  | -1.67860300 | -0.00002500 |
| N | 0.34236600  | -1.57436200 | -0.00008800 |
| N | 2.40241500  | -0.57962100 | -0.00003900 |
| N | 0.56720500  | 0.80863800  | -0.00010000 |
| C | -0.27526200 | 1.90089700  | 0.00001900  |
| N | -1.51987500 | 1.51336900  | 0.00012900  |
| C | -1.51729800 | 0.13198000  | -0.00000800 |
| C | 3.85085900  | -0.83905500 | 0.00019400  |
| C | -2.74185700 | -0.60857700 | -0.00002100 |
| O | -3.00601000 | -1.75950500 | 0.00003100  |
| N | -3.97029900 | 0.41180900  | 0.00003400  |
| H | 0.09363100  | 2.91410200  | 0.00003300  |
| H | 4.29828900  | -0.39584600 | -0.88799800 |
| H | 3.97969900  | -1.91686300 | 0.00064000  |
| H | 4.29812700  | -0.39511900 | 0.88810100  |
| H | -4.54516300 | 0.23819000  | 0.82830100  |
| H | -3.61179900 | 1.37792000  | -0.00006500 |
| H | -4.54532000 | 0.23807700  | -0.82809300 |

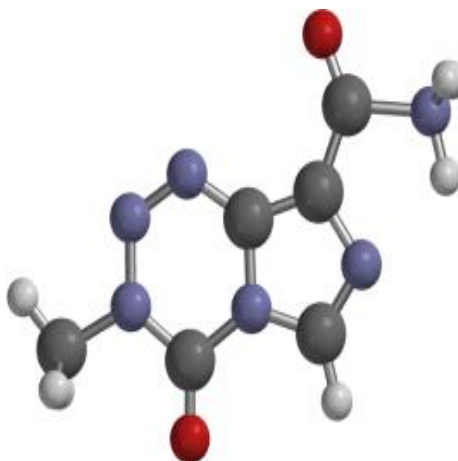

---

**N14-B****V1=63.06 cm<sup>-1</sup>**

|   |             |             |             |
|---|-------------|-------------|-------------|
| O | -2.81706500 | 1.52893000  | -0.00000600 |
| C | -1.97456800 | 0.68466600  | 0.00004700  |
| C | 0.30991700  | -0.10412000 | 0.00009200  |
| N | -1.32138700 | -1.68600900 | 0.00007100  |
| N | -0.07587900 | -1.40673300 | 0.00011500  |
| N | -2.23219100 | -0.70267100 | 0.00001500  |
| N | -0.59086400 | 0.92836500  | -0.00001800 |
| C | 0.14010000  | 2.10979400  | -0.00001200 |
| N | 1.41765000  | 1.86599300  | -0.00014600 |
| C | 1.56624900  | 0.49855600  | -0.00006300 |
| C | -3.64201300 | -1.13063200 | -0.00003900 |
| C | 2.85326500  | -0.14195200 | -0.00003200 |
| O | 3.95375600  | 0.28307400  | 0.00025100  |
| N | 2.72653900  | -1.73266500 | -0.00018400 |
| H | -0.33769100 | 3.07698100  | -0.00002800 |
| H | -4.13653800 | -0.74143000 | 0.88830300  |
| H | -3.64642700 | -2.21598400 | -0.00109600 |
| H | -4.13695700 | -0.73964800 | -0.88735100 |
| H | 3.21945600  | -2.08557700 | 0.82474400  |
| H | 1.74053600  | -2.06696200 | -0.00013800 |
| H | 3.21932700  | -2.08525000 | -0.82531200 |

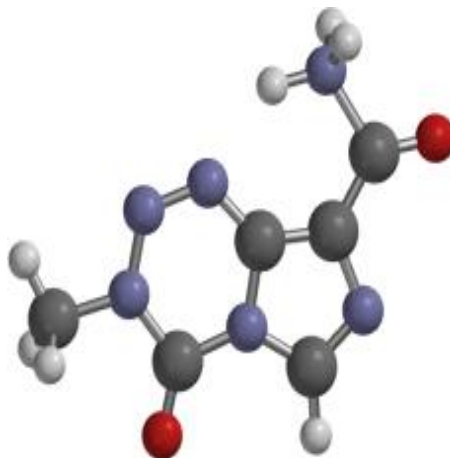

---

**N4-A****V1=50.26 cm<sup>-1</sup>**

|   |             |             |             |
|---|-------------|-------------|-------------|
| O | -2.67231500 | 1.71657800  | 0.00003100  |
| C | -1.93551700 | 0.77937800  | 0.00000800  |
| C | 0.31974200  | -0.25278600 | 0.00005700  |
| N | -1.43705700 | -1.58413700 | -0.00005500 |
| N | -0.17105900 | -1.48326200 | -0.00001500 |
| N | -2.35036500 | -0.55489000 | -0.00012100 |
| N | -0.52780700 | 0.87228300  | 0.00009200  |
| C | 0.27023200  | 1.96246700  | 0.00014100  |
| N | 1.55344800  | 1.61764800  | 0.00010800  |
| C | 1.62342500  | 0.27325200  | 0.00004500  |
| C | -3.77374000 | -0.92478100 | -0.00011100 |
| C | 2.90098700  | -0.51784900 | -0.00000300 |
| O | 2.84706900  | -1.73153100 | 0.00041300  |
| N | 4.01714300  | 0.23583900  | -0.00053700 |
| H | -0.11963700 | 2.96932200  | 0.00018400  |
| H | -4.00936900 | -1.49414200 | 0.89949200  |
| H | -4.00921200 | -1.49457700 | -0.89947400 |
| H | -4.33826100 | 0.00313000  | -0.00037000 |
| H | 4.91387400  | -0.22748500 | -0.00013200 |
| H | 3.97606300  | 1.24348800  | -0.00027600 |
| H | -1.83239800 | -2.52256500 | -0.00010500 |

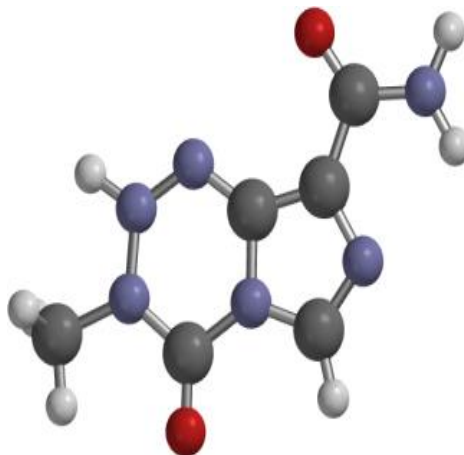

---

**O1-A****V1=47.79 cm<sup>-1</sup>**

|   |             |             |             |
|---|-------------|-------------|-------------|
| O | -2.77546200 | 1.57214900  | 0.00002800  |
| C | -1.88869100 | 0.61097200  | -0.00000300 |
| C | 0.33621700  | -0.28402900 | 0.00000000  |
| N | -1.37340500 | -1.78275300 | 0.00001400  |
| N | -0.15755700 | -1.54148400 | 0.00003000  |
| N | -2.29835000 | -0.62959100 | -0.00002600 |
| N | -0.54964400 | 0.83069300  | -0.00002700 |
| C | 0.24869500  | 1.95550400  | -0.00006800 |
| N | 1.50988300  | 1.62448800  | 0.00008200  |
| C | 1.60422800  | 0.25846400  | -0.00001200 |
| C | -3.71844900 | -1.01336700 | 0.00000400  |
| C | 2.90670700  | -0.49252100 | 0.00002000  |
| O | 2.90065000  | -1.70515200 | -0.00004200 |
| N | 3.99983200  | 0.29924500  | 0.00001100  |
| H | -0.13426000 | 2.96544200  | -0.00008000 |
| H | -4.20548200 | -0.62606100 | 0.89356100  |
| H | -3.73928000 | -2.09965700 | -0.00097400 |
| H | -4.20596200 | -0.62441300 | -0.89256500 |
| H | 4.90906800  | -0.13849300 | -0.00001900 |
| H | 3.93058700  | 1.30462200  | 0.00000800  |
| H | -2.40371900 | 2.46826200  | -0.00005500 |

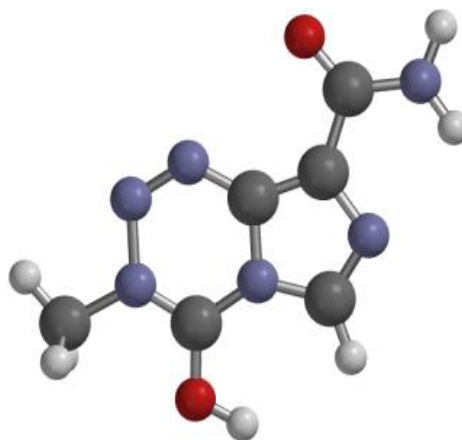

---

**O1B****V1=31.94 cm<sup>-1</sup>**

|   |             |             |             |
|---|-------------|-------------|-------------|
| O | 2.82306200  | 1.50138300  | 0.00013100  |
| C | 1.89059200  | 0.58755800  | 0.00025200  |
| C | -0.35313700 | -0.22237400 | -0.00032700 |
| N | 1.31387100  | -1.77318300 | 0.00000000  |
| N | 0.09542200  | -1.49195100 | -0.00012900 |
| N | 2.25224600  | -0.67695500 | 0.00024700  |
| N | 0.56809400  | 0.86305800  | -0.00017100 |
| C | -0.21012800 | 2.00790000  | -0.00095000 |
| N | -1.47640100 | 1.70831700  | 0.00035800  |
| C | -1.61070700 | 0.34760000  | -0.00034700 |
| C | 3.66504500  | -1.10091000 | 0.00026500  |
| C | -2.98863600 | -0.28040500 | -0.00004000 |
| O | -3.96069500 | 0.43674900  | 0.00031400  |
| N | -3.01401200 | -1.63447400 | 0.00014500  |
| H | 0.19709400  | 3.00859200  | -0.00098100 |
| H | 4.16118200  | -0.72522700 | -0.89290100 |
| H | 3.65531300  | -2.18685900 | 0.00020500  |
| H | 4.16109900  | -0.72531400 | 0.89351300  |
| H | -3.91780300 | -2.08407800 | 0.00051800  |
| H | -2.18512600 | -2.20753100 | -0.00003700 |
| H | 2.49659300  | 2.41546600  | -0.00013300 |

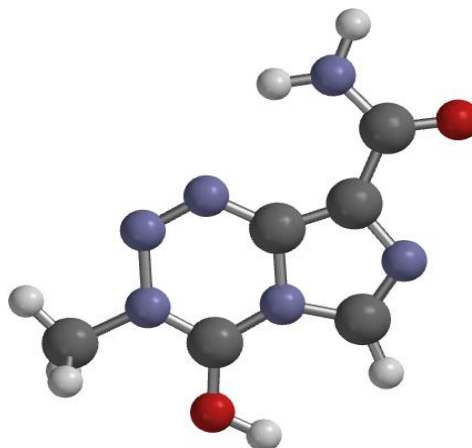



---

**N7-A****V1=50.31 cm<sup>-1</sup>**

|   |             |             |             |
|---|-------------|-------------|-------------|
| O | 2.45812300  | 1.64793600  | -0.57415500 |
| C | 1.90874100  | 0.70311400  | -0.11860500 |
| C | -0.31370300 | -0.23769900 | 0.51856800  |
| N | 1.43891600  | -1.67031500 | 0.42670400  |
| N | 0.23022300  | -1.48339200 | 0.66519000  |
| N | 2.23768100  | -0.60076900 | -0.06725900 |
| N | 0.57289200  | 0.92863800  | 0.68260400  |
| C | -0.31826700 | 2.05877300  | 0.29403700  |
| N | -1.47733200 | 1.64405300  | 0.00965100  |
| C | -1.51637000 | 0.23413200  | 0.11597400  |
| C | 3.53214900  | -1.03626100 | -0.63267800 |
| C | -2.73125400 | -0.58205100 | -0.23299700 |
| O | -2.65384000 | -1.79059700 | -0.21316600 |
| N | -3.82173200 | 0.15108600  | -0.54000000 |
| H | 0.05910000  | 3.07099600  | 0.33051000  |
| H | 3.47106700  | -1.06202200 | -1.71964400 |
| H | 3.72093900  | -2.03304800 | -0.24378600 |
| H | 4.31044000  | -0.34504600 | -0.31795000 |
| H | -4.67379000 | -0.33619400 | -0.77813800 |
| H | -3.81287700 | 1.15907100  | -0.54192900 |
| H | 0.85854900  | 1.06238700  | 1.66548100  |

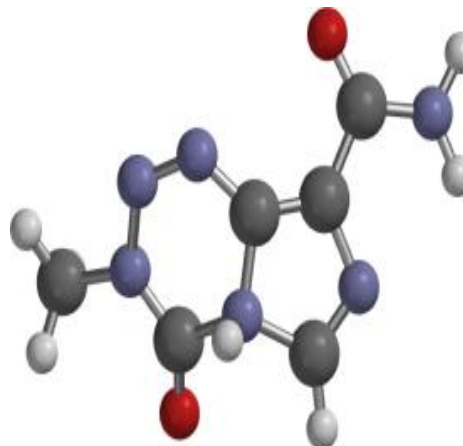

---

**N7-B****V1=13.65 cm<sup>-1</sup>**

|   |             |             |             |
|---|-------------|-------------|-------------|
| O | -2.54675800 | 1.57805500  | 0.50176800  |
| C | -1.92778500 | 0.65911100  | 0.08387600  |
| C | 0.33321500  | -0.19671200 | -0.49978400 |
| N | -1.34466600 | -1.71422500 | -0.30005400 |
| N | -0.14045300 | -1.47627000 | -0.54786800 |
| N | -2.20164300 | -0.66952100 | 0.07871300  |
| N | -0.60797500 | 0.92060700  | -0.68690700 |
| C | 0.26454400  | 2.10134100  | -0.33661500 |
| N | 1.44079100  | 1.73367700  | -0.07732100 |
| C | 1.53202400  | 0.32676400  | -0.15356600 |
| C | -3.49948900 | -1.12354800 | 0.62528900  |
| C | 2.81928900  | -0.34038900 | 0.28341700  |
| O | 3.59806200  | 0.31365800  | 0.93711700  |
| N | 2.97242000  | -1.62832200 | -0.08789700 |
| H | -0.15168100 | 3.09703800  | -0.40026600 |
| H | -3.48455400 | -1.06023800 | 1.71229600  |
| H | -3.62706200 | -2.15488200 | 0.30937500  |
| H | -4.29282300 | -0.49607700 | 0.22618500  |
| H | 3.80318800  | -2.11178300 | 0.22326500  |
| H | 2.25886400  | -2.15355200 | -0.56976500 |
| H | -0.87647500 | 1.02477400  | -1.67852800 |

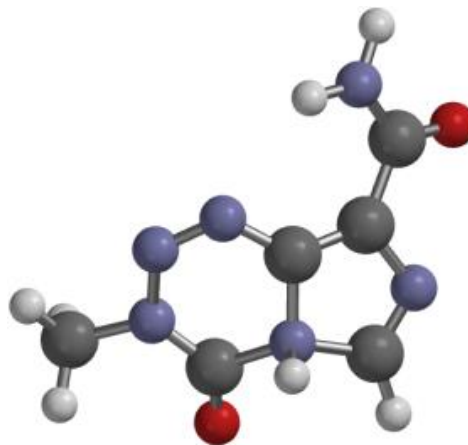

---

**O13w****V1=41.93 cm<sup>-1</sup>**

|   |             |             |             |
|---|-------------|-------------|-------------|
| O | 2.80268200  | -1.96291800 | -0.01742900 |
| C | 2.20463000  | -0.92846100 | -0.00742900 |
| C | 0.18000100  | 0.40612900  | -0.00790500 |
| N | 2.14643800  | 1.53068400  | 0.02875500  |
| N | 0.87496200  | 1.57379600  | 0.01568700  |
| N | 2.79164500  | 0.34332800  | 0.01948700  |
| N | 0.80110100  | -0.82041000 | -0.02134600 |
| C | -0.18201900 | -1.78214000 | -0.04837400 |
| N | -1.36746800 | -1.22977700 | -0.05307600 |
| C | -1.18035100 | 0.13423100  | -0.02606000 |
| C | 4.26174900  | 0.41786200  | 0.03795200  |
| C | -2.25929900 | 1.10449200  | -0.02243900 |
| N | -1.97112300 | 2.39071800  | -0.02445500 |
| O | -3.49979900 | 0.77995900  | -0.02192900 |
| O | -4.19080800 | -1.62853900 | 0.16208100  |
| H | -3.41454800 | -2.17207800 | -0.03891100 |
| H | -4.95560500 | -1.99014100 | -0.30291900 |
| H | -1.00693500 | 2.70878800  | -0.02384400 |
| H | -2.72521900 | 3.06473300  | -0.01279900 |
| H | 4.63919900  | -0.09160200 | 0.92294000  |
| H | 4.52654500  | 1.47033500  | 0.05686400  |
| H | 4.66035800  | -0.06513400 | -0.85257800 |
| H | 0.04422400  | -2.83618700 | -0.06309800 |
| H | -3.74176300 | -0.22776900 | 0.02271400  |

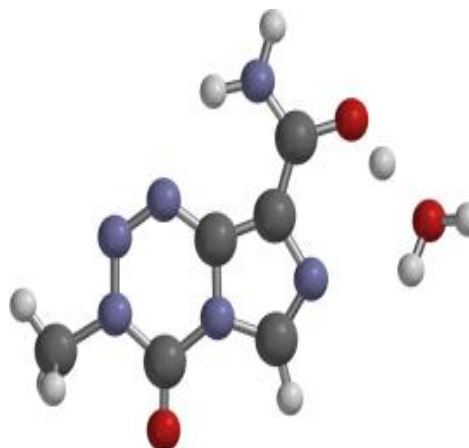

---

**N9w****V1=56.65 cm<sup>-1</sup>**

|   |             |             |             |
|---|-------------|-------------|-------------|
| O | 2.69608400  | -1.99880100 | -0.00925100 |
| C | 2.15846000  | -0.93259800 | -0.00479100 |
| C | 0.15738500  | 0.48408400  | -0.00913600 |
| N | 2.16655100  | 1.52998000  | 0.01314300  |
| N | 0.90562600  | 1.62273700  | 0.00396900  |
| N | 2.77818400  | 0.30781300  | 0.00952000  |
| N | 0.74394100  | -0.77401500 | -0.01421800 |
| C | -0.22348100 | -1.70880900 | -0.02508400 |
| N | -1.38747700 | -1.07692800 | -0.02890500 |
| C | -1.20499500 | 0.28745200  | -0.01800300 |
| C | 4.25091200  | 0.34258300  | 0.02228900  |
| C | -2.37442000 | 1.21916400  | -0.01062200 |
| O | -3.50516900 | 0.75693900  | -0.00986700 |
| N | -2.07405500 | 2.52746600  | -0.00542600 |
| O | -3.84801800 | -2.01781300 | 0.10796500  |
| H | -4.37802500 | -2.67415100 | -0.35912000 |
| H | -0.05982700 | -2.77394300 | -0.02750600 |
| H | -2.34802600 | -1.54502600 | -0.03124400 |
| H | 4.61826900  | -0.16793500 | 0.91088200  |
| H | 4.63352000  | -0.15596200 | -0.86665000 |
| H | 4.54215900  | 1.38824500  | 0.03189500  |
| H | -2.83579800 | 3.19077600  | 0.00450200  |
| H | -1.12221400 | 2.86740800  | -0.00260800 |
| H | -4.30578000 | -1.16264800 | 0.05456200  |

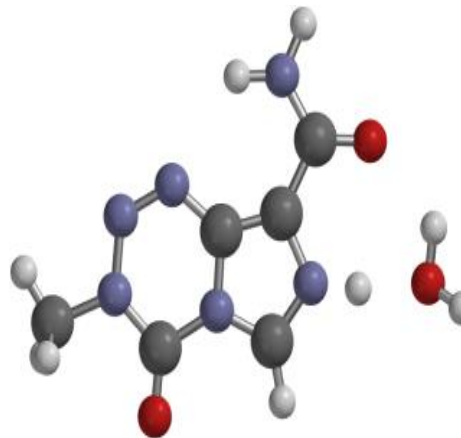

---

**TS-1****V1= -1398.73 cm<sup>-1</sup>**

|   |             |             |             |
|---|-------------|-------------|-------------|
| O | 2.67132000  | 1.69357900  | 0.00004000  |
| C | 1.96672200  | 0.72966300  | 0.00002000  |
| C | -0.22212300 | -0.36379900 | 0.00001500  |
| N | 1.59800000  | -1.70505200 | 0.00003500  |
| N | 0.33422500  | -1.60515200 | 0.00003500  |
| N | 2.38817800  | -0.59728000 | 0.00001400  |
| N | 0.54930200  | 0.79426200  | -0.00000800 |
| C | -0.27132300 | 1.88193700  | -0.00003100 |
| N | -1.51031200 | 1.44480100  | -0.00002000 |
| C | -1.52243900 | 0.07628200  | 0.00000300  |
| C | 3.83838900  | -0.85652300 | 0.00006700  |
| C | -2.93595700 | -0.34869200 | -0.00004100 |
| O | -3.70644700 | 0.64554300  | -0.00010500 |
| N | -3.32177200 | -1.60810200 | -0.00002000 |
| H | 0.07342900  | 2.90313600  | -0.00004600 |
| H | 4.28577300  | -0.41363800 | -0.88814800 |
| H | 3.96691400  | -1.93434700 | -0.00062000 |
| H | 4.28554100  | -0.41482000 | 0.88899400  |
| H | -4.30955000 | -1.82758300 | -0.00005900 |
| H | -2.65186200 | -2.36453400 | 0.00003300  |
| H | -2.75218200 | 1.56124900  | -0.00008500 |

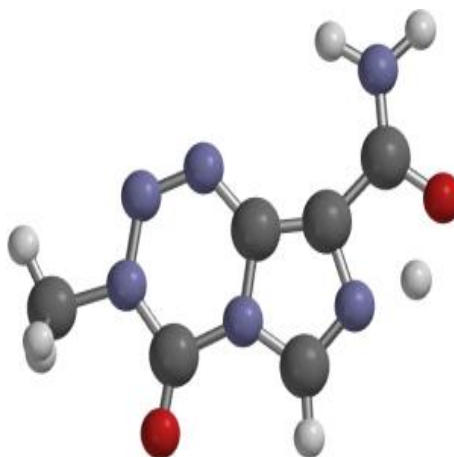

---

**TSw****V1= -488.87 cm<sup>-1</sup>**

|   |             |             |             |
|---|-------------|-------------|-------------|
| O | 2.76717900  | -1.93726900 | 0.00367000  |
| C | 2.17816500  | -0.89746400 | 0.00214100  |
| C | 0.13148200  | 0.43370300  | 0.00633100  |
| N | 2.09706800  | 1.56249500  | -0.00444100 |
| N | 0.83101800  | 1.60269000  | 0.00103900  |
| N | 2.75356500  | 0.36949200  | -0.00457900 |
| N | 0.76589800  | -0.79544200 | 0.00757300  |
| C | -0.18349700 | -1.76446100 | 0.01188900  |
| N | -1.37446600 | -1.20182000 | 0.01527100  |
| C | -1.22302300 | 0.17024700  | 0.01077600  |
| C | 4.22320300  | 0.45815300  | -0.01212100 |
| C | -2.37790400 | 1.10551400  | 0.00563200  |
| O | -3.54813300 | 0.69340700  | -0.00053600 |
| N | -2.08362100 | 2.40696100  | 0.00960900  |
| O | -3.76971300 | -1.79632400 | -0.10879300 |
| H | -4.23033500 | -2.25443700 | 0.60888700  |
| H | 0.03785800  | -2.81933200 | 0.00963200  |
| H | -2.63121400 | -1.73407200 | -0.00466600 |
| H | 4.62135400  | -0.03057700 | 0.87546200  |
| H | 4.61238600  | -0.03500400 | -0.90123500 |
| H | 4.47696000  | 1.51357500  | -0.01608900 |
| H | -2.84639000 | 3.06960800  | -0.00053300 |
| H | -1.12897300 | 2.74373400  | 0.01065400  |
| H | -3.92308100 | -0.77678700 | -0.05604200 |

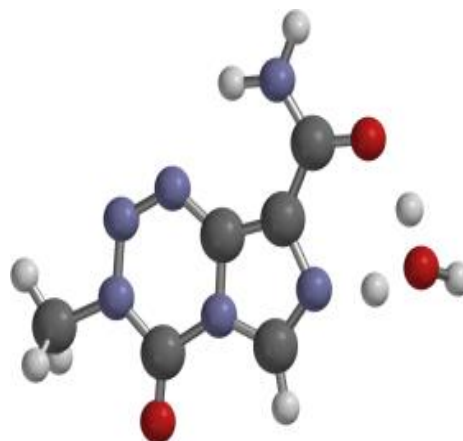

**S3.** Cartesian coordinates of all optimized structures of Temozolomide degradation at the B3LYP/6-31+G(d) level of theory.

**TMZ+water (rotamer A)**

**V1= 29.69 cm<sup>-1</sup>**

|   |             |             |             |
|---|-------------|-------------|-------------|
| C | 0.39914700  | -0.18320400 | -0.30449400 |
| N | -0.41418800 | 0.94150800  | -0.15115800 |
| C | 0.40149100  | 2.00615000  | 0.11593900  |
| N | 1.66436700  | 1.63420600  | 0.13032900  |
| C | 1.69636100  | 0.28152700  | -0.12335700 |
| C | -1.81084800 | 0.86340300  | -0.21687700 |
| N | -2.21560500 | -0.41870600 | -0.53679800 |
| N | -1.39769100 | -1.52948500 | -0.67763400 |
| N | -0.14073800 | -1.41180000 | -0.56796200 |
| C | -3.64905200 | -0.70259600 | -0.59781900 |
| O | -2.55238000 | 1.80949000  | -0.03750300 |
| C | 2.97726600  | -0.47839300 | -0.16147100 |
| N | 4.08000300  | 0.30646000  | 0.00325300  |
| O | 3.02225900  | -1.69380700 | -0.32219800 |
| H | 0.01534700  | 3.00111100  | 0.28256300  |
| H | -4.13378100 | -0.01044800 | -1.28967000 |
| H | -4.09423300 | -0.59126500 | 0.39510800  |
| H | -3.75504800 | -1.72965900 | -0.94606500 |
| H | 4.99037600  | -0.13126600 | 0.00133200  |
| H | 3.99298700  | 1.30322900  | 0.14889900  |
| H | -0.76754200 | -1.79968300 | 2.31114300  |
| O | -1.24694300 | -0.95832700 | 2.37555000  |
| H | -1.15080600 | -0.67745500 | 3.29815600  |

**TS-I of path-1(rotamer A)**

**V1= -1305.02 cm<sup>-1</sup>**

|   |             |             |             |
|---|-------------|-------------|-------------|
| N | -0.03863900 | 1.59295300  | 0.01752500  |
| N | 2.18200300  | 0.77912300  | 0.06341900  |
| N | 0.37178100  | -0.79091100 | -0.14608000 |
| C | 1.80112100  | -0.70769400 | -0.13674500 |
| C | -0.48288600 | 0.29742800  | -0.00885400 |
| N | 1.16273100  | 1.90141200  | -0.00603100 |
| C | -1.76837500 | -0.23418600 | -0.05516400 |
| N | -1.69325900 | -1.59403300 | -0.21271900 |
| C | -0.40869700 | -1.89674300 | -0.26945100 |
| O | 2.50857000  | -1.47320800 | -0.75536600 |
| C | 3.38840700  | 1.19612400  | -0.67953300 |
| C | -3.08148300 | 0.47589300  | 0.03084600  |
| O | -3.16565200 | 1.68860600  | 0.18532700  |
| N | -4.15160600 | -0.35849000 | -0.08099600 |
| H | 0.01145000  | -2.88526600 | -0.38955500 |
| H | 4.22265300  | 0.55687400  | -0.38903700 |
| H | 3.59006300  | 2.23458700  | -0.41376800 |
| H | 3.21851600  | 1.10684200  | -1.75496400 |
| H | -5.08054000 | 0.03258800  | -0.01040600 |
| H | -4.02497400 | -1.35627500 | -0.18695600 |
| H | 2.37203900  | 0.45319700  | 1.18809300  |
| O | 2.07556900  | -0.75162000 | 1.73400200  |
| H | 2.82328900  | -1.34807000 | 1.91247600  |

**I of path-1(rotamer A)**V1= 48.75 cm<sup>-1</sup>

|   |             |             |             |
|---|-------------|-------------|-------------|
| N | -0.03423300 | -1.20569300 | 0.85123500  |
| N | -1.83706700 | -1.74071700 | -0.40830000 |
| N | 1.62236200  | 0.25757900  | -0.00724100 |
| C | 2.65866000  | -0.69767200 | -0.05142600 |
| C | 0.25272000  | 0.00507900  | 0.21933100  |
| N | -0.98419100 | -1.99686100 | 0.57826500  |
| C | -0.34496500 | 1.24803500  | 0.01441500  |
| N | 0.60607900  | 2.21040900  | -0.31023200 |
| C | 1.75405200  | 1.60384000  | -0.31790100 |
| O | 2.51602100  | -1.88683500 | -0.15888100 |
| C | -2.96878800 | -2.65696600 | -0.49958400 |
| C | -1.76329800 | 1.63903000  | 0.10973000  |
| O | -2.68290700 | 0.81125700  | 0.20854300  |
| N | -1.98889700 | 2.97485500  | 0.06394900  |
| H | 2.71203900  | 2.03889800  | -0.56109900 |
| H | -3.33490700 | -2.66236500 | -1.53014800 |
| H | -3.78418400 | -2.35884900 | 0.17228800  |
| H | -2.62681200 | -3.65892700 | -0.23345500 |
| H | -2.94310300 | 3.30669700  | 0.06009100  |
| H | -1.22206500 | 3.61703000  | -0.08757900 |
| H | -2.06724400 | -0.74858500 | -0.55446600 |
| O | 3.85538100  | -0.06502000 | 0.02190500  |
| H | 4.53964200  | -0.75420200 | -0.05929500 |

**II of path-1(rotamer A)**V1= 50.12 cm<sup>-1</sup>

|   |             |             |             |
|---|-------------|-------------|-------------|
| N | 0.16318700  | 1.10950200  | -1.12516000 |
| N | -1.01303100 | 2.55925500  | 0.18218100  |
| N | 1.35369300  | -0.66015000 | -0.03754200 |
| C | 2.62836700  | -0.02400500 | 0.00500400  |
| C | 0.13940400  | -0.01850400 | -0.31488800 |
| N | -0.44422600 | 2.20285600  | -0.95212400 |
| C | -0.83062700 | -0.97005600 | -0.01345000 |
| N | -0.24037200 | -2.13652200 | 0.45805300  |
| C | 1.04365500  | -1.93419800 | 0.43875800  |
| O | 2.78947200  | 1.12048800  | 0.32432200  |
| C | -0.90861700 | 1.96663200  | 1.51163800  |
| C | -2.28996700 | -0.86016900 | -0.21116900 |
| O | -2.82758000 | 0.18805400  | -0.57504000 |
| N | -2.98367100 | -2.00506700 | 0.05031500  |
| H | 1.80182100  | -2.61050200 | 0.81236700  |
| H | -1.55608300 | 1.09278100  | 1.62017000  |
| H | -1.21776400 | 2.73498600  | 2.22484100  |
| H | 0.12974200  | 1.69139100  | 1.72246600  |
| H | -3.98451700 | -2.00756400 | -0.08543400 |
| H | -2.50526900 | -2.84989900 | 0.33186100  |
| H | -1.44642900 | 3.46738100  | 0.09140300  |
| O | 3.65091900  | -0.84860300 | -0.30862800 |
| H | 3.33364900  | -1.64540400 | -0.76832300 |

**TS-II of path-1(rotamer A)**V1= -1874.66 cm<sup>-1</sup>

|   |             |             |             |
|---|-------------|-------------|-------------|
| C | 0.12974500  | -0.10432600 | -0.48217700 |
| N | 1.30531500  | -0.88833500 | -0.33169300 |
| C | 0.86046000  | -2.10215100 | 0.23501300  |
| N | -0.42327300 | -2.14807900 | 0.37996900  |
| C | -0.91568500 | -0.90906100 | -0.06219900 |
| N | 0.25619100  | 1.05104900  | -1.22678600 |
| N | -0.27210700 | 2.18330000  | -1.00958000 |
| C | 2.81335200  | -0.13234900 | 0.21894900  |
| O | 3.43673600  | -0.42603900 | -0.84057100 |
| O | 2.89829400  | 0.39991700  | 1.26948300  |
| C | -2.36491900 | -0.63792700 | -0.13052400 |
| O | -2.81367200 | 0.44404600  | -0.51692000 |
| H | 1.55828700  | -2.88932400 | 0.49268000  |
| H | 2.31424700  | -0.88253700 | -1.17941300 |
| N | -0.77985600 | 2.54197800  | 0.15139400  |
| H | -1.15350000 | 3.47970000  | 0.09777200  |
| C | -0.63982400 | 1.92764700  | 1.46715100  |
| H | -0.84588700 | 2.70811400  | 2.20371400  |
| H | 0.38489300  | 1.56923100  | 1.61283400  |
| H | -1.34009700 | 1.10108000  | 1.61050100  |
| N | -3.15493700 | -1.67343300 | 0.27650200  |
| H | -4.15668200 | -1.58000800 | 0.18458200  |
| H | -2.75022600 | -2.56599100 | 0.52548200  |

**III of path-1(rotamer A)**V1= 20.95 cm<sup>-1</sup>

|   |             |             |             |
|---|-------------|-------------|-------------|
| C | -0.05145500 | -0.41768900 | 0.16751600  |
| N | 0.46068300  | -1.58045600 | 0.70676600  |
| C | -0.54661400 | -2.50562600 | 0.76034500  |
| N | -1.66650000 | -2.02272600 | 0.27944500  |
| C | -1.38783900 | -0.72154900 | -0.10821300 |
| N | 0.86497000  | 0.56460900  | -0.21769600 |
| N | 0.75356100  | 1.81775000  | -0.05853700 |
| C | 3.75728900  | -0.28248400 | -0.50562400 |
| O | 3.49693500  | -1.13168200 | 0.26225600  |
| O | 4.07121000  | 0.54279100  | -1.26545000 |
| C | -2.38724500 | 0.10624200  | -0.80980700 |
| O | -2.15113800 | 1.25677800  | -1.18969600 |
| H | -0.40414500 | -3.49848700 | 1.16558800  |
| H | 1.44106700  | -1.71174800 | 0.92849100  |
| N | -0.14009900 | 2.39607400  | 0.72531100  |
| H | -0.05644700 | 3.40101400  | 0.66520400  |
| C | -0.97089300 | 1.84095800  | 1.78862300  |
| H | -1.25131000 | 2.67610500  | 2.43592100  |
| H | -0.40224900 | 1.11531500  | 2.37932600  |
| H | -1.87442700 | 1.36497600  | 1.40228300  |
| N | -3.59693300 | -0.50267300 | -0.98908500 |
| H | -4.28538300 | -0.03870000 | -1.56447100 |
| H | -3.71238900 | -1.47871800 | -0.74968600 |

**TMZ+water (rotamer B)****V1= 8.69 cm<sup>-1</sup>**

|   |             |             |             |
|---|-------------|-------------|-------------|
| C | -0.83546000 | 0.23249600  | -0.04113300 |
| N | 0.16887300  | -0.72405300 | -0.20926600 |
| C | -0.45613200 | -1.94654400 | -0.24536100 |
| N | -1.75823800 | -1.81804900 | -0.11386300 |
| C | -2.02871800 | -0.47985100 | 0.01552500  |
| C | 1.51330000  | -0.36244600 | -0.30487100 |
| O | 2.41689600  | -1.16833100 | -0.45443800 |
| C | -3.42911800 | 0.02773700  | 0.18627900  |
| N | -3.53738800 | 1.38429900  | 0.30052800  |
| O | -4.38822800 | -0.73014700 | 0.21741800  |
| N | -0.53898200 | 1.56137700  | 0.03170200  |
| N | 0.66615600  | 1.94864200  | -0.05249700 |
| N | 1.67494500  | 1.00886600  | -0.21534300 |
| C | 3.02688200  | 1.57763700  | -0.31609900 |
| H | 0.09254500  | -2.86899600 | -0.36836300 |
| H | -2.73586300 | 2.00353900  | 0.27161800  |
| H | -4.46257700 | 1.77418700  | 0.41796000  |
| H | 3.66657700  | 1.18631100  | 0.47774000  |
| H | 2.91642100  | 2.65744100  | -0.22585000 |
| H | 3.46309100  | 1.32111000  | -1.28487900 |
| H | 5.50054600  | -1.49388600 | 1.19611700  |
| O | 4.95453000  | -0.75771200 | 0.88487700  |
| H | 4.22158500  | -1.15193500 | 0.37793200  |

**TS-I of path-1(rotamer B)****V1= -1355.74 cm<sup>-1</sup>**

|   |             |             |             |
|---|-------------|-------------|-------------|
| N | -0.13879500 | 1.50590900  | 0.04321900  |
| N | 2.10344800  | 0.84776200  | 0.05618000  |
| N | 0.39014000  | -0.85334800 | -0.13904300 |
| C | 1.80921500  | -0.69566100 | -0.10992900 |
| C | -0.50982700 | 0.19255500  | 0.00240200  |
| N | 1.05180000  | 1.88832100  | 0.00949500  |
| C | -1.78018900 | -0.38557900 | -0.06865200 |
| N | -1.65089100 | -1.73339400 | -0.24243600 |
| C | -0.35538000 | -1.98501000 | -0.28711900 |
| O | 2.57231800  | -1.41277300 | -0.71893600 |
| C | 3.27863700  | 1.31318900  | -0.70996800 |
| C | -3.13494500 | 0.26187300  | 0.00631900  |
| O | -4.16040000 | -0.40252500 | -0.03356200 |
| N | -3.12331000 | 1.62132800  | 0.12337900  |
| H | 0.09980000  | -2.95672500 | -0.41855100 |
| H | 4.13741600  | 0.69630200  | -0.44537000 |
| H | 3.45518200  | 2.35482100  | -0.43867700 |
| H | 3.08597600  | 1.22838800  | -1.78205100 |
| H | -4.01419800 | 2.09640800  | 0.17569700  |
| H | -2.26649400 | 2.16104800  | 0.14303300  |
| H | 2.33154900  | 0.51899300  | 1.18509300  |
| O | 2.09235400  | -0.68402100 | 1.71873500  |
| H | 2.86479200  | -1.24892400 | 1.89706100  |

**I of path-1 (rotamer B)**V1= 23.70 cm<sup>-1</sup>

|   |             |             |             |
|---|-------------|-------------|-------------|
| N | -0.02140000 | 0.89902000  | -1.17985300 |
| N | -0.38782500 | 2.18568500  | 0.63173400  |
| N | -1.00259400 | -1.06317900 | 0.02031400  |
| C | -2.38733000 | -0.92555700 | -0.16850500 |
| C | 0.08251500  | -0.24396100 | -0.35169400 |
| N | -0.22289800 | 2.04443300  | -0.67023200 |
| C | 1.20764800  | -0.92604700 | 0.06830000  |
| N | 0.85191900  | -2.11354500 | 0.69715800  |
| C | -0.44119900 | -2.17943300 | 0.64721400  |
| O | -3.18325900 | -1.78178500 | 0.14365700  |
| C | -0.40938900 | 3.52764300  | 1.19263100  |
| C | 2.64571300  | -0.54937100 | -0.08729000 |
| O | 3.53621600  | -1.12117100 | 0.52787100  |
| N | 2.89115800  | 0.49663500  | -0.94221800 |
| H | -1.07101000 | -2.97121700 | 1.02687200  |
| H | 0.57178000  | 3.81175000  | 1.59244200  |
| H | -1.15487800 | 3.57821900  | 1.99179400  |
| H | -0.68689500 | 4.21938000  | 0.39533500  |
| H | 3.86242100  | 0.67491800  | -1.16320200 |
| H | 2.18531400  | 0.81938000  | -1.59479600 |
| H | -0.19028200 | 1.38835700  | 1.23975200  |
| O | -2.70207800 | 0.25892800  | -0.71603600 |
| H | -3.66975100 | 0.26845100  | -0.83439400 |

**II of path-1 (rotamer B)**V1= 33.36 cm<sup>-1</sup>

|   |             |             |             |
|---|-------------|-------------|-------------|
| C | -0.19696000 | -0.18403000 | 0.30688500  |
| N | 0.71618100  | -1.20721500 | 0.00140300  |
| C | -0.02956100 | -2.21430700 | -0.61977300 |
| N | -1.28579700 | -1.90305600 | -0.71338400 |
| C | -1.42511000 | -0.65848000 | -0.12020200 |
| N | 0.09636600  | 0.89829600  | 1.16855500  |
| N | 0.61205900  | 1.97633300  | 0.72973300  |
| N | 0.88247100  | 2.13227000  | -0.54271000 |
| C | 1.64280100  | 3.29638100  | -0.96715600 |
| C | 2.12468300  | -1.16443300 | 0.17694900  |
| O | 2.69122300  | -2.37095700 | 0.37514400  |
| O | 2.76516400  | -0.14859600 | 0.12645200  |
| C | -2.77344100 | -0.02394900 | 0.00817500  |
| O | -3.74526200 | -0.43802400 | -0.61116500 |
| N | -2.83139500 | 1.05463500  | 0.84969100  |
| H | 0.43640600  | -3.10092800 | -1.03187000 |
| H | 0.79205300  | 1.33435800  | -1.17240300 |
| H | 1.54160200  | 4.06230500  | -0.19634600 |
| H | 1.23744000  | 3.67347200  | -1.91072700 |
| H | 2.70273300  | 3.04663900  | -1.09487900 |
| H | 2.03100800  | -3.04634500 | 0.60945000  |
| H | -3.74709100 | 1.44192400  | 1.03540300  |
| H | -2.06682100 | 1.28325500  | 1.47564500  |



**TS-II of path-1(rotamer B)****VI= -1869.44 cm<sup>-1</sup>**

|   |             |             |             |
|---|-------------|-------------|-------------|
| C | -0.20610900 | -0.30307000 | 0.49170200  |
| N | 0.77509300  | -1.30492800 | 0.28015900  |
| C | 0.09006600  | -2.29519800 | -0.47018300 |
| N | -1.15137300 | -2.01252800 | -0.67790000 |
| C | -1.37030700 | -0.76644400 | -0.07084000 |
| N | 0.05298000  | 0.78810000  | 1.35100600  |
| N | 0.48501500  | 1.89341800  | 0.88463500  |
| N | 0.67904600  | 2.05632000  | -0.40303500 |
| C | 1.22351300  | 3.30930400  | -0.89825500 |
| C | 2.47281900  | -0.94699400 | -0.07973800 |
| O | 2.89602600  | -1.52567700 | 0.96105200  |
| O | 2.79680900  | -0.34428300 | -1.04302000 |
| C | -2.72660800 | -0.13919100 | -0.09024300 |
| O | -3.60825300 | -0.52235000 | -0.84777900 |
| N | -2.89218200 | 0.90995400  | 0.77640900  |
| H | 0.60135500  | -3.19217500 | -0.79873400 |
| H | 0.49542300  | 1.28560000  | -1.04753400 |
| H | 1.31101000  | 3.99117700  | -0.05071100 |
| H | 0.55390600  | 3.74358700  | -1.64805600 |
| H | 2.21239600  | 3.14923300  | -1.34201200 |
| H | 1.66330100  | -1.68924100 | 1.17245000  |
| H | -3.82678000 | 1.28802900  | 0.86107900  |
| H | -2.22755700 | 1.09947900  | 1.51792500  |

**III of path-1(rotamer B)****VI= 20.19 cm<sup>-1</sup>**

|   |             |             |             |
|---|-------------|-------------|-------------|
| C | -0.07602000 | -0.62616600 | -0.10826800 |
| N | 0.49801000  | -1.74192900 | -0.67355200 |
| C | -0.48867600 | -2.67687500 | -0.83741300 |
| N | -1.64849400 | -2.24122300 | -0.40972400 |
| C | -1.42191600 | -0.96486800 | 0.06517100  |
| N | 0.78246800  | 0.42869900  | 0.27599300  |
| N | 0.57823100  | 1.62651600  | -0.11327600 |
| N | -0.42449600 | 1.92806500  | -0.91195600 |
| C | -0.66996100 | 3.31893600  | -1.24671900 |
| C | 3.75200500  | -0.19513300 | 0.44467800  |
| O | 3.51710300  | -1.08458000 | -0.28394400 |
| O | 4.03593200  | 0.67511200  | 1.16572600  |
| C | -2.51732700 | -0.19064100 | 0.71117300  |
| O | -3.70101500 | -0.36235700 | 0.44935700  |
| N | -2.09893200 | 0.78269100  | 1.59605700  |
| H | -0.30041000 | -3.64754900 | -1.27647500 |
| H | -1.09538700 | 1.20917100  | -1.18167900 |
| H | 0.21172500  | 3.89406600  | -0.95743800 |
| H | -1.54677000 | 3.70397500  | -0.71211800 |
| H | -0.83188600 | 3.42087400  | -2.32464400 |
| H | 1.48674400  | -1.82498900 | -0.88293600 |
| H | -2.83097100 | 1.22292100  | 2.14017000  |
| H | -1.18534400 | 0.72486700  | 2.02949500  |

**TMZ+water (rotamer A)****V1= 29.69 cm<sup>-1</sup>**

|   |             |             |             |
|---|-------------|-------------|-------------|
| C | 0.39914700  | -0.18320400 | -0.30449400 |
| N | -0.41418800 | 0.94150800  | -0.15115800 |
| C | 0.40149100  | 2.00615000  | 0.11593900  |
| N | 1.66436700  | 1.63420600  | 0.13032900  |
| C | 1.69636100  | 0.28152700  | -0.12335700 |
| C | -1.81084800 | 0.86340300  | -0.21687700 |
| N | -2.21560500 | -0.41870600 | -0.53679800 |
| N | -1.39769100 | -1.52948500 | -0.67763400 |
| N | -0.14073800 | -1.41180000 | -0.56796200 |
| C | -3.64905200 | -0.70259600 | -0.59781900 |
| O | -2.55238000 | 1.80949000  | -0.03750300 |
| C | 2.97726600  | -0.47839300 | -0.16147100 |
| N | 4.08000300  | 0.30646000  | 0.00325300  |
| O | 3.02225900  | -1.69380700 | -0.32219800 |
| H | 0.01534700  | 3.00111100  | 0.28256300  |
| H | -4.13378100 | -0.01044800 | -1.28967000 |
| H | -4.09423300 | -0.59126500 | 0.39510800  |
| H | -3.75504800 | -1.72965900 | -0.94606500 |
| H | 4.99037600  | -0.13126600 | 0.00133200  |
| H | 3.99298700  | 1.30322900  | 0.14889900  |
| H | -0.76754200 | -1.79968300 | 2.31114300  |
| O | -1.24694300 | -0.95832700 | 2.37555000  |
| H | -1.15080600 | -0.67745500 | 3.29815600  |

**TS-I of path-2(rotamer A)****V1= -1503.41 cm<sup>-1</sup>**

|   |             |             |             |
|---|-------------|-------------|-------------|
| N | -0.18805300 | -1.44683200 | 0.44717600  |
| N | -2.06715000 | -0.69611100 | -0.50208200 |
| N | -0.39336600 | 0.90237500  | -0.02767600 |
| C | -1.78482900 | 0.71700300  | 0.21169800  |
| C | 0.42033300  | -0.20954200 | 0.10636400  |
| N | -1.33682500 | -1.70775800 | -0.28065700 |
| C | 1.70757800  | 0.25009600  | -0.08262500 |
| N | 1.66594800  | 1.61456600  | -0.33369300 |
| C | 0.40812700  | 1.98524500  | -0.28381200 |
| O | -2.65236200 | 1.55586600  | 0.11981400  |
| C | -3.32405700 | -0.86440800 | -1.23050600 |
| C | 2.99101000  | -0.50170500 | -0.05433200 |
| O | 3.05078800  | -1.70764400 | 0.16645000  |
| N | 4.08378900  | 0.27697300  | -0.29977500 |
| H | 0.01362900  | 2.97952700  | -0.43681800 |
| H | -3.47343900 | -1.93024500 | -1.40552000 |
| H | -3.26155800 | -0.32090100 | -2.17736300 |
| H | -4.13226700 | -0.43248000 | -0.63636500 |
| H | 4.99810900  | -0.15174500 | -0.28176500 |
| H | 3.98752600  | 1.27046300  | -0.46119200 |
| H | -0.82357500 | -0.99907000 | 1.43851700  |
| O | -1.60707800 | 0.02089800  | 1.81621000  |
| H | -2.49857700 | -0.23112900 | 2.11694200  |

**I of path-2(rotamer A)****V1= 40.78 cm<sup>-1</sup>**

|   |             |             |             |
|---|-------------|-------------|-------------|
| N | 0.12554900  | 1.17844700  | 0.85535900  |
| N | 1.78972300  | 1.43736000  | -0.58657500 |
| N | 0.45150100  | -1.14073600 | 0.00638100  |
| C | 1.79550800  | -1.45357500 | 0.29671300  |
| C | -0.32027400 | -0.01598700 | 0.29852400  |
| N | 1.06888100  | 1.99568200  | 0.26020100  |
| C | -1.60513100 | -0.35649800 | -0.07013700 |
| N | -1.64234000 | -1.64235000 | -0.59046800 |
| C | -0.41674400 | -2.07793700 | -0.54983500 |
| O | 2.38992100  | -2.34882900 | -0.25713900 |
| C | 2.77694100  | 2.35120300  | -1.15902600 |
| C | -2.79202200 | 0.50513300  | 0.08162900  |
| O | -2.72264700 | 1.60327100  | 0.65073000  |
| N | -3.94021700 | 0.00282800  | -0.43940900 |
| H | -0.05226200 | -3.03915200 | -0.88167100 |
| H | 2.69654100  | 3.36229000  | -0.74262200 |
| H | 2.62954100  | 2.37673700  | -2.24455600 |
| H | 3.77813900  | 1.94533400  | -0.97146800 |
| H | -4.79808000 | 0.52573000  | -0.33267100 |
| H | -3.95399500 | -0.91672200 | -0.86064700 |
| H | -0.65766400 | 1.74280300  | 1.18481200  |
| O | 2.27636600  | -0.70075700 | 1.29407300  |
| H | 3.20730800  | -0.95916200 | 1.42186100  |

**II of path-2(rotamer A)****V1= 46.97 cm<sup>-1</sup>**

|   |             |             |             |
|---|-------------|-------------|-------------|
| N | 0.39715900  | -1.10071700 | 0.29555400  |
| N | 2.20090100  | -2.26383700 | -0.04078300 |
| N | 0.13410700  | 1.30228900  | -0.08510700 |
| C | 1.42331400  | 1.80756600  | 0.30273600  |
| C | -0.36204100 | 0.01834000  | 0.09238000  |
| N | 1.68871100  | -1.13178700 | -0.13900900 |
| C | -1.73742000 | 0.12353600  | -0.02634800 |
| N | -2.09939000 | 1.44428100  | -0.24992800 |
| C | -0.99308600 | 2.12282600  | -0.28425000 |
| O | 2.00878200  | 1.46927400  | 1.28883200  |
| C | 3.58703400  | -2.28958700 | -0.49717500 |
| C | -2.67281700 | -1.00440600 | 0.04960900  |
| O | -2.26653200 | -2.15512300 | 0.27034000  |
| N | -3.98296500 | -0.69854500 | -0.14106300 |
| H | -0.89605500 | 3.19403700  | -0.40000200 |
| H | 3.92911800  | -1.31111500 | -0.85485900 |
| H | 3.67191500  | -3.03668400 | -1.29462000 |
| H | 4.21473400  | -2.62409200 | 0.33690900  |
| H | -4.67325500 | -1.43211500 | -0.06422600 |
| H | -4.27418300 | 0.25847900  | -0.28813600 |
| H | -0.12000800 | -1.97556900 | 0.43158400  |
| O | 1.87389300  | 2.76557200  | -0.53349500 |
| H | 1.37902100  | 2.75783700  | -1.37143200 |

**TS-II of path-2(rotamer A)**V1= -1783.59 cm<sup>-1</sup>

|   |             |             |             |
|---|-------------|-------------|-------------|
| N | -0.30642300 | 1.15257100  | -0.11532000 |
| N | -2.18622600 | 2.23987800  | -0.05185100 |
| N | -0.12877700 | -1.26042600 | -0.41952900 |
| C | -1.73169300 | -1.84678500 | 0.40345300  |
| C | 0.42643800  | 0.00180800  | -0.19657400 |
| N | -1.65678000 | 1.11237900  | -0.15878700 |
| C | 1.79192100  | -0.15299600 | -0.09261000 |
| N | 2.12104300  | -1.50666200 | -0.23065300 |
| C | 0.99484900  | -2.12334100 | -0.40486900 |
| O | -1.84527400 | -1.88262200 | 1.56655400  |
| C | -3.64311200 | 2.18003600  | -0.09523600 |
| C | 2.75058600  | 0.93250800  | 0.12400600  |
| O | 2.36543800  | 2.10779500  | 0.23314300  |
| N | 4.05744400  | 0.56577000  | 0.19399500  |
| O | -2.23591800 | -2.06974400 | -0.72840500 |
| H | 0.20054600  | 2.02951000  | 0.04212000  |
| H | 0.87335000  | -3.18978900 | -0.54809300 |
| H | -4.03260800 | 2.60320400  | 0.83812600  |
| H | -3.98910700 | 2.81998300  | -0.91529400 |
| H | -4.01960300 | 1.15885700  | -0.23020200 |
| H | 4.75887000  | 1.27483000  | 0.35432100  |
| H | 4.32696600  | -0.40498000 | 0.10740700  |
| H | -1.22828100 | -1.60699500 | -1.17272300 |

**III of path-2(rotamer A)**V1= 12.48 cm<sup>-1</sup>

|   |             |             |             |
|---|-------------|-------------|-------------|
| N | 0.30199200  | 1.14006900  | 0.00104600  |
| N | -1.36261200 | 2.53366400  | 0.00317600  |
| N | 0.11675000  | -1.28363400 | 0.00795300  |
| C | -3.96923500 | -1.40533700 | -0.00626800 |
| C | 0.83961200  | -0.12266500 | 0.00283900  |
| N | -1.03244800 | 1.32531000  | 0.00419100  |
| C | 2.17347300  | -0.50453600 | 0.00020700  |
| N | 2.26277200  | -1.88823900 | 0.00381700  |
| C | 1.02926900  | -2.32305100 | 0.00797100  |
| O | -4.98741400 | -0.83689300 | -0.01339900 |
| C | -2.80738300 | 2.72391000  | 0.00633700  |
| C | 3.30657300  | 0.42093200  | -0.00486200 |
| O | 3.12991000  | 1.65073500  | -0.00742300 |
| N | 4.53913300  | -0.15304500 | -0.00658000 |
| O | -2.94973000 | -1.98289400 | 0.00093400  |
| H | 0.95359200  | 1.93053700  | -0.00168400 |
| H | 0.71401800  | -3.35729600 | 0.01146500  |
| H | -3.07877800 | 3.31496600  | 0.88910000  |
| H | -3.08335100 | 3.31024000  | -0.87818500 |
| H | -3.36049600 | 1.77599900  | 0.01024000  |
| H | 5.35786300  | 0.43810600  | -0.00992500 |
| H | 4.63563100  | -1.15964800 | -0.00416000 |
| H | -0.89356600 | -1.35488100 | 0.00969400  |

**TMZ+water (rotamer B)****V1= 8.69 cm<sup>-1</sup>**

|   |             |             |             |
|---|-------------|-------------|-------------|
| C | -0.83546000 | 0.23249600  | -0.04113300 |
| N | 0.16887300  | -0.72405300 | -0.20926600 |
| C | -0.45613200 | -1.94654400 | -0.24536100 |
| N | -1.75823800 | -1.81804900 | -0.11386300 |
| C | -2.02871800 | -0.47985100 | 0.01552500  |
| C | 1.51330000  | -0.36244600 | -0.30487100 |
| O | 2.41689600  | -1.16833100 | -0.45443800 |
| C | -3.42911800 | 0.02773700  | 0.18627900  |
| N | -3.53738800 | 1.38429900  | 0.30052800  |
| O | -4.38822800 | -0.73014700 | 0.21741800  |
| N | -0.53898200 | 1.56137700  | 0.03170200  |
| N | 0.66615600  | 1.94864200  | -0.05249700 |
| N | 1.67494500  | 1.00886600  | -0.21534300 |
| C | 3.02688200  | 1.57763700  | -0.31609900 |
| H | 0.09254500  | -2.86899600 | -0.36836300 |
| H | -2.73586300 | 2.00353900  | 0.27161800  |
| H | -4.46257700 | 1.77418700  | 0.41796000  |
| H | 3.66657700  | 1.18631100  | 0.47774000  |
| H | 2.91642100  | 2.65744100  | -0.22585000 |
| H | 3.46309100  | 1.32111000  | -1.28487900 |
| H | 5.50054600  | -1.49388600 | 1.19611700  |
| O | 4.95453000  | -0.75771200 | 0.88487700  |
| H | 4.22158500  | -1.15193500 | 0.37793200  |

**TS-I of path-2(rotamer B)****V1= -1543.36 cm<sup>-1</sup>**

|   |             |             |             |
|---|-------------|-------------|-------------|
| N | -0.06847900 | -1.36684600 | 0.47051200  |
| N | -1.97811000 | -0.76765500 | -0.50552300 |
| N | -0.41667900 | 0.96946700  | -0.01353600 |
| C | -1.78840200 | 0.71122400  | 0.23105700  |
| C | 0.45609700  | -0.09529000 | 0.11215300  |
| N | -1.18598000 | -1.72317200 | -0.28295400 |
| C | 1.71864700  | 0.41326800  | -0.11031100 |
| N | 1.61229600  | 1.76777500  | -0.37599400 |
| C | 0.34378600  | 2.08292300  | -0.30525500 |
| O | -2.71656400 | 1.47375100  | 0.12295900  |
| C | -3.21192000 | -1.01236800 | -1.24915700 |
| C | 3.03301600  | -0.29644500 | -0.10132900 |
| O | 4.09102400  | 0.27349900  | -0.33390800 |
| N | 2.95254000  | -1.63282400 | 0.18450100  |
| H | -0.09497500 | 3.05741300  | -0.46582700 |
| H | -3.30976000 | -2.08586900 | -1.41533300 |
| H | -3.16154200 | -0.47584400 | -2.20100000 |
| H | -4.04880400 | -0.61183200 | -0.67244100 |
| H | 3.81262100  | -2.16278500 | 0.20654700  |
| H | 2.07124400  | -2.09375600 | 0.38097900  |
| H | -0.76146600 | -0.93485700 | 1.45091300  |
| O | -1.59351200 | 0.00962800  | 1.81205300  |
| H | -2.47136100 | -0.29459000 | 2.10534700  |

**I of path-2(rotamer B)**V1= 28.55 cm<sup>-1</sup>

|   |             |             |             |
|---|-------------|-------------|-------------|
| N | -0.05094500 | 0.94996500  | -1.13815400 |
| N | -0.50342800 | 2.05060700  | 0.73217100  |
| N | -0.88201900 | -1.10522700 | 0.01888500  |
| C | -2.26728400 | -1.08516900 | -0.18464900 |
| C | 0.14776100  | -0.24925800 | -0.43188200 |
| N | -0.54445100 | 2.09874500  | -0.50522200 |
| C | 1.31147000  | -0.79911100 | 0.05352400  |
| N | 1.04288000  | -1.95506900 | 0.76984800  |
| C | -0.24644600 | -2.10900600 | 0.73944400  |
| O | -3.03412300 | -1.84595800 | 0.35795800  |
| C | -0.94828700 | 3.29511000  | 1.35708500  |
| C | 2.72926000  | -0.32448100 | -0.08939700 |
| O | 3.65543500  | -0.90390100 | 0.46118000  |
| N | 2.90885800  | 0.77353100  | -0.88309800 |
| H | -0.81427100 | -2.91368900 | 1.18515600  |
| H | -1.26400200 | 4.04367900  | 0.62070100  |
| H | -0.12233600 | 3.68457500  | 1.96273100  |
| H | -1.77254000 | 3.05759000  | 2.03845400  |
| H | 3.84399900  | 1.15011700  | -0.95599400 |
| H | 2.12644300  | 1.28622600  | -1.26958700 |
| H | -0.48365700 | 0.88296600  | -2.05267900 |
| O | -2.62979200 | -0.13378700 | -1.07014000 |
| H | -3.60090200 | -0.17865900 | -1.14652900 |

**II of path-2(rotamer B)**V1= 39.01 cm<sup>-1</sup>

|   |             |             |             |
|---|-------------|-------------|-------------|
| N | -0.15500500 | 0.86272000  | -1.16011300 |
| N | -0.86588800 | 2.01214000  | 0.60181000  |
| N | -0.83155500 | -1.14838900 | 0.06423500  |
| C | -2.23752200 | -1.18413500 | -0.21899900 |
| C | 0.15883100  | -0.25937800 | -0.35858400 |
| N | -0.42528600 | 2.12048400  | -0.54851100 |
| C | 1.34481400  | -0.75267900 | 0.14402500  |
| N | 1.11105600  | -1.91364000 | 0.85584300  |
| C | -0.17790600 | -2.11366500 | 0.80682300  |
| O | -2.95898900 | -1.97284800 | 0.33233300  |
| C | -1.20949300 | 3.29937100  | 1.20407700  |
| C | 2.73375800  | -0.24569000 | -0.06916300 |
| O | 3.70345900  | -0.98518600 | -0.08681600 |
| N | 2.83164300  | 1.11105300  | -0.33432500 |
| H | -0.72405600 | -2.92449600 | 1.26694500  |
| H | -0.99033600 | 4.14419900  | 0.54142400  |
| H | -0.65429000 | 3.39000400  | 2.14363000  |
| H | -2.27609100 | 3.27613900  | 1.45262000  |
| H | 3.78373400  | 1.45866300  | -0.37573900 |
| H | 2.16247800  | 1.74603700  | 0.08421800  |
| H | 0.50444700  | 1.03329300  | -1.91422700 |
| O | -2.64929600 | -0.30868200 | -1.13640600 |
| H | -1.89691700 | 0.23637900  | -1.47341500 |

**TS-II of path-2(rotamer B)****V1= -1811.96 cm<sup>-1</sup>**

|   |             |             |             |
|---|-------------|-------------|-------------|
| N | 0.01460700  | 0.85032700  | 1.29689500  |
| N | 0.76613700  | 1.95624700  | -0.46371500 |
| N | 0.68671700  | -1.30816300 | 0.28484900  |
| C | 2.48519900  | -1.00757800 | -0.08782900 |
| C | -0.27394300 | -0.30165900 | 0.53659400  |
| N | 0.73095800  | 1.93331200  | 0.77493500  |
| C | -1.44226900 | -0.70147900 | -0.05915200 |
| N | -1.25579900 | -1.92831300 | -0.69914400 |
| C | -0.01621400 | -2.24472400 | -0.48937100 |
| O | 2.84949800  | -0.47175800 | -1.06327300 |
| C | 1.47229800  | 3.12328800  | -0.98660900 |
| C | -2.78709700 | -0.03651200 | -0.10175700 |
| O | -3.70756600 | -0.49418800 | -0.76487400 |
| N | -2.90893300 | 1.09201000  | 0.66021100  |
| H | 0.46496300  | -3.14836200 | -0.84564600 |
| H | 1.84466100  | 3.77929800  | -0.19071300 |
| H | 0.78441500  | 3.67090500  | -1.64039300 |
| H | 2.30201800  | 2.76453500  | -1.60535000 |
| H | -3.77482800 | 1.60936400  | 0.59235500  |
| H | -2.11131200 | 1.51087100  | 1.12147500  |
| H | 0.26817600  | 0.72543100  | 2.27079700  |
| O | 2.82369400  | -1.57727300 | 0.98898600  |
| H | 1.63326000  | -1.72224200 | 1.16129200  |

**III of path-2(rotamer B)****V1= 3.53 cm<sup>-1</sup>**

|   |             |             |             |
|---|-------------|-------------|-------------|
| N | 1.18729100  | 1.50770400  | -0.02979600 |
| N | -0.91842400 | 2.16910800  | -0.05000600 |
| N | -0.23787400 | -0.47801100 | 0.02676500  |
| C | -4.59307700 | -1.19783600 | 0.04461000  |
| C | 0.98560200  | 0.13361000  | 0.02836300  |
| N | 0.29070800  | 2.50874500  | -0.11227500 |
| C | 1.92914900  | -0.89811000 | 0.03445000  |
| N | 1.27596300  | -2.11299900 | 0.02434100  |
| C | -0.00333300 | -1.83329100 | 0.02899400  |
| O | -5.69339000 | -1.58665200 | 0.05467100  |
| C | -1.81142100 | 3.32254400  | -0.13342400 |
| C | 3.39834900  | -0.77859800 | -0.02759600 |
| O | 4.13742000  | -1.59909800 | -0.54675700 |
| N | 3.89653600  | 0.43311900  | 0.49416700  |
| H | -0.81130600 | -2.55125100 | 0.04267100  |
| H | -1.25822900 | 4.26342900  | -0.23828700 |
| H | -2.43106100 | 3.35379900  | 0.77067700  |
| H | -2.48082200 | 3.18712900  | -0.99111400 |
| H | 4.91293200  | 0.45101000  | 0.49367600  |
| H | 3.50931700  | 0.71427900  | 1.39126300  |
| H | 2.14615400  | 1.81551800  | -0.14605700 |
| O | -3.48932300 | -0.80780600 | 0.03453300  |
| H | -1.11565700 | 0.03097400  | 0.01283300  |

**S4.** Cartesian coordinates of all optimized transition states of Temozolomide reaction with different nucleophiles at the CBS-4M level of theory.

**OH<sup>-</sup>** first detected transition state

**V1= -1069.25 cm<sup>-1</sup>**      **ΔG (kcal.mol<sup>-1</sup>) = 7.23**

|   |             |             |             |
|---|-------------|-------------|-------------|
| C | -0.52420600 | -0.33347700 | -0.19796500 |
| N | 0.32621500  | 0.74044000  | -0.30636400 |
| C | -0.41600200 | 1.88389000  | -0.19307500 |
| N | -1.66691900 | 1.58467300  | -0.03471600 |
| C | -1.76803500 | 0.19537900  | -0.03903300 |
| C | 1.70668500  | 0.61844400  | -0.47818100 |
| N | 2.08782200  | -0.70679300 | -0.49648100 |
| N | 1.23181700  | -1.76368100 | -0.37091900 |
| N | -0.02143500 | -1.61234800 | -0.25852200 |
| C | 3.50690400  | -0.96178400 | -0.02447400 |
| O | 2.39644100  | 1.56445500  | -0.75359400 |
| C | -3.06292400 | -0.46546700 | 0.11484400  |
| N | -4.07873300 | 0.42100200  | 0.27640000  |
| O | -3.23372700 | -1.67395300 | 0.09931200  |
| H | 0.02944300  | 2.84619800  | -0.22779200 |
| H | 3.31460600  | -0.29379600 | 1.09032400  |
| H | 4.18151900  | -0.55981200 | -0.76965500 |
| H | 3.60236600  | -2.03843100 | 0.03191100  |
| H | -5.00398800 | 0.07619500  | 0.39680500  |
| H | -3.88584000 | 1.39787300  | 0.28870500  |
| O | 2.56978100  | 0.42472500  | 1.89919900  |
| H | 2.09603400  | -0.21500500 | 2.47187800  |

**OH<sup>-</sup>** second detected transition state

**V1= -432.30 cm<sup>-1</sup>**      **ΔG (kcal.mol<sup>-1</sup>) = 20.58**

|   |             |             |             |
|---|-------------|-------------|-------------|
| C | -0.36367600 | -0.13591500 | -0.10541400 |
| N | 0.48825800  | 0.91225200  | -0.39484700 |
| C | -0.28744600 | 2.07208100  | -0.33498500 |
| N | -1.52844700 | 1.78264400  | -0.20400000 |
| C | -1.63366700 | 0.37882500  | -0.10699400 |
| C | 1.81030600  | 0.70575200  | -0.05733500 |
| N | 2.18430300  | -0.60558300 | -0.37821300 |
| N | 1.28428900  | -1.66503200 | -0.48356100 |
| N | 0.06872400  | -1.44731700 | -0.34787900 |
| C | 3.55155500  | -1.02864800 | -0.11545300 |
| O | 2.62898500  | 1.56935000  | 0.16967700  |
| C | -2.90624700 | -0.30401300 | -0.00175200 |
| N | -2.81367400 | -1.66819100 | 0.03318600  |
| O | -3.99809700 | 0.25214100  | 0.04183200  |
| H | 0.14903900  | 3.03537500  | -0.43223200 |
| H | 3.69875800  | -1.19731200 | 0.94487300  |
| H | 4.22269200  | -0.25285600 | -0.44543900 |
| H | 3.73078900  | -1.94253800 | -0.66074600 |
| H | -3.66055000 | -2.18442800 | 0.11274900  |
| H | -1.93807300 | -2.13952600 | -0.04029800 |
| O | 0.65183400  | -0.05088300 | 1.65881400  |
| H | 0.72644300  | -0.77348500 | 2.31730800  |



**MeOH****VI= -1661.35 cm<sup>-1</sup>       $\Delta G$  (kcal.mol<sup>-1</sup>) = 55.91**

|   |             |             |             |
|---|-------------|-------------|-------------|
| N | -0.38714900 | 1.64315900  | 0.37494800  |
| N | 1.86207600  | 1.14055700  | -0.02639100 |
| N | 0.21485000  | -0.55539800 | -0.41644000 |
| C | 1.62410900  | -0.35188900 | -0.40889000 |
| C | -0.72376800 | 0.35503000  | 0.02026600  |
| N | 0.75762400  | 2.08488900  | 0.32822900  |
| C | -1.92725200 | -0.25963600 | -0.10080900 |
| N | -1.73552400 | -1.52468900 | -0.61012300 |
| C | -0.45209200 | -1.67501200 | -0.79554400 |
| O | 2.36019500  | -0.90949400 | -1.21648900 |
| C | 2.83556700  | 1.85380600  | -0.88952000 |
| C | -3.27642800 | 0.25661500  | 0.21166000  |
| O | -3.46777200 | 1.36851400  | 0.66586300  |
| N | -4.24650700 | -0.63780900 | -0.06042300 |
| H | 0.04487500  | -2.52833900 | -1.18643400 |
| H | 3.67572000  | 1.20199600  | -1.05650700 |
| H | 3.13338800  | 2.75489000  | -0.37854200 |
| H | 2.37506100  | 2.09909900  | -1.83507300 |
| H | -5.19524400 | -0.39153600 | 0.11688200  |
| H | -4.01815700 | -1.53332200 | -0.43323200 |
| H | 2.26681000  | 0.55607000  | 1.02689900  |
| O | 2.04255900  | -0.64102200 | 1.16837600  |
| C | 2.87633800  | -1.77933100 | 1.47120100  |
| H | 3.26805300  | -2.16267300 | 0.53917600  |
| H | 3.68804700  | -1.46367300 | 2.11087900  |
| H | 2.28515200  | -2.52896000 | 1.97517500  |

**MeNH<sub>2</sub>****VI= -1787.00 cm<sup>-1</sup>       $\Delta G$  (kcal.mol<sup>-1</sup>) = 53.86**

|   |             |             |             |
|---|-------------|-------------|-------------|
| N | -0.45209900 | 1.63517300  | 0.38240000  |
| N | 1.80130600  | 1.20480200  | -0.03088700 |
| N | 0.20067200  | -0.60632200 | -0.29658200 |
| C | 1.63867700  | -0.40649600 | -0.31450000 |
| C | -0.75194800 | 0.32261600  | 0.07064500  |
| N | 0.68032200  | 2.11204900  | 0.30557800  |
| C | -1.95266500 | -0.30122500 | -0.06163600 |
| N | -1.74723700 | -1.57982300 | -0.52695100 |
| C | -0.45787100 | -1.73203900 | -0.67199400 |
| O | 2.32309100  | -0.89363400 | -1.22858000 |
| C | 2.69005600  | 1.89958900  | -0.99252100 |
| C | -3.31121900 | 0.21854000  | 0.19874000  |
| O | -3.52275000 | 1.33302800  | 0.63794100  |
| N | -4.27159700 | -0.67971300 | -0.09903300 |
| H | 0.04877100  | -2.59278500 | -1.03377200 |
| H | 3.54550500  | 1.27179400  | -1.17301000 |
| H | 2.98146300  | 2.84534100  | -0.56339100 |
| H | 2.16624300  | 2.06155100  | -1.92338600 |
| H | -5.22602900 | -0.43098900 | 0.03960400  |
| H | -4.02950700 | -1.57685800 | -0.45872900 |
| H | 2.29228300  | 0.65210500  | 1.00835100  |
| N | 2.16303400  | -0.64975700 | 1.16221500  |
| H | 1.41630800  | -0.88740300 | 1.79769200  |
| C | 3.31372600  | -1.58327900 | 1.26039900  |
| H | 2.97546700  | -2.59519400 | 1.44165400  |
| H | 3.82814400  | -1.55167100 | 0.31408800  |
| H | 3.96526500  | -1.27214600 | 2.06402700  |

**CH<sub>3</sub>COOH****VI= -484.75 cm<sup>-1</sup>****ΔG (kcal.mol<sup>-1</sup>) = 55.10**

|   |             |             |             |
|---|-------------|-------------|-------------|
| N | 1.00492900  | 1.68023100  | -0.60570900 |
| N | 0.14519400  | -0.12021200 | 0.73580500  |
| N | -1.27108800 | 1.64251400  | 0.01910100  |
| C | -1.16207400 | 0.37482100  | 0.84925200  |
| N | -0.02526200 | 2.32833500  | -0.61490700 |
| C | 1.16340100  | 0.46096500  | -0.00362600 |
| C | 2.23348100  | -0.35934500 | 0.11983000  |
| N | 1.89015900  | -1.42878900 | 0.91412900  |
| C | 0.64715700  | -1.26414000 | 1.27326400  |
| C | 3.59196900  | -0.20664100 | -0.45257900 |
| N | 4.41002000  | -1.21972400 | -0.12064600 |
| O | 3.89682800  | 0.74582900  | -1.14265300 |
| C | -2.10264300 | 2.71277500  | 0.64995600  |
| O | -1.88084700 | 0.16667400  | 1.79048100  |
| C | -2.84238900 | -1.26691700 | -0.94651300 |
| O | -3.74156600 | -1.11854700 | -1.74141400 |
| O | -1.88177400 | -0.36263600 | -0.75951100 |
| C | -2.70879000 | -2.48546200 | -0.05747900 |
| H | 0.06907300  | -1.90482700 | 1.89247900  |
| H | 5.34687400  | -1.21658900 | -0.46053700 |
| H | 4.08655500  | -1.97026800 | 0.45012300  |
| H | -3.04919900 | 2.28240100  | 0.92839400  |
| H | -2.22695200 | 3.49307500  | -0.08167800 |
| H | -1.59185100 | 3.08759900  | 1.52214000  |
| H | -1.76440300 | 1.11798800  | -0.79276000 |
| H | -1.74458300 | -2.95212200 | -0.22368700 |
| H | -2.76623900 | -2.17477900 | 0.97968500  |
| H | -3.49872300 | -3.18585100 | -0.27640800 |

**CH<sub>3</sub>COOH product****VI= 22.93 cm<sup>-1</sup>****ΔG (kcal.mol<sup>-1</sup>) = 40.11**

|   |             |             |             |
|---|-------------|-------------|-------------|
| N | 0.83916600  | 1.36193100  | -1.03884200 |
| N | 0.01547800  | -0.17496600 | 0.62249500  |
| N | -1.13684300 | 1.83802800  | 0.13096900  |
| C | -1.38364300 | 0.24391800  | 0.56811200  |
| N | -0.10847800 | 2.12956100  | -1.00109300 |
| C | 1.02073300  | 0.29149600  | -0.19589700 |
| C | 2.12040200  | -0.45426200 | 0.09368800  |
| N | 1.80060400  | -1.35791500 | 1.07454400  |
| C | 0.53669300  | -1.17000400 | 1.37162300  |
| C | 3.48514400  | -0.36007400 | -0.47137600 |
| N | 4.31804700  | -1.28824900 | 0.03369000  |
| O | 3.79201300  | 0.47598900  | -1.29921900 |
| C | -0.82548700 | 2.68587100  | 1.32491300  |
| O | -2.06510500 | 0.10933300  | 1.59614200  |
| C | -2.92666600 | -1.05832400 | -0.89270600 |
| O | -3.68997300 | -0.86105700 | -1.78846700 |
| O | -1.88927000 | -0.15242800 | -0.70341200 |
| C | -2.93495600 | -2.23671500 | 0.03734500  |
| H | -0.03577400 | -1.70100500 | 2.09149000  |
| H | 5.26227900  | -1.31614100 | -0.28298100 |
| H | 3.99657200  | -1.93750000 | 0.71827200  |
| H | -1.54492700 | 2.42865100  | 2.08524800  |
| H | -0.88378600 | 3.72721200  | 1.05059600  |
| H | 0.16942900  | 2.44332000  | 1.66285600  |
| H | -2.00740800 | 2.11630600  | -0.30162300 |
| H | -1.99202900 | -2.76589700 | -0.04330200 |
| H | -3.04961400 | -1.88837700 | 1.05269100  |
| H | -3.74519700 | -2.89142500 | -0.24013700 |
